# Supplementary material for: How Enzymes, Proteins, and Antibodies Recognize Extended DNAs; General Regularities
Source: PubMed Central journal article supplement (PMC7866405; doi:10.3390/ijms22031369), 2021-01-29
Supplement: ijms-22-01369-s001.pdf [file ijms-22-01369-s001.pdf]

## Supplementary Tables S1-S26

### Supplementary Table S1

$K_d$  values for oligonucleotides of different structure and lengths interacting with template binding site of DNA polymerase 1 (Klenow fragment)

| $K_d, \mu\text{M}^*$     |         |                     |         |                     |        |                     |        |
|--------------------------|---------|---------------------|---------|---------------------|--------|---------------------|--------|
| $\text{KH}_2\text{PO}_4$ | 26      | -                   | -       | -                   | -      | -                   | -      |
| dTMP                     | 14.9    | dAMP                | 13.3    | dCMP                | 16.5   | dGMP                | 33.0   |
| d(pT) <sub>2</sub>       | 9.3     | d(pA) <sub>2</sub>  | 6.8     | d(pC) <sub>2</sub>  | 7.7    | d(pG) <sub>2</sub>  | 6.5    |
| d(pT) <sub>3</sub>       | 4.6     | d(pA) <sub>3</sub>  | 3.4     | d(pC) <sub>3</sub>  | 4.9    | -                   | -      |
| d(pT) <sub>4</sub>       | 2.6     | d(pA) <sub>4</sub>  | 1.7     | d(pC) <sub>4</sub>  | 24.0   | -                   | -      |
| d(pT) <sub>5</sub>       | 1.5     | d(pA) <sub>5</sub>  | 0.85    | d(pC) <sub>5</sub>  | 2.6    | -                   | -      |
| d(pT) <sub>6</sub>       | 0.82    | d(pA) <sub>6</sub>  | 0.47    | d(pC) <sub>6</sub>  | 1.6    | d(pG) <sub>6</sub>  | 0.5    |
| d(pT) <sub>7</sub>       | 0.46    | d(pA) <sub>7</sub>  | 0.26    | d(pC) <sub>7</sub>  | 1.1    | d(pG) <sub>7</sub>  | 0.24   |
| d(pT) <sub>8</sub>       | 0.26    | d(pA) <sub>8</sub>  | 0.13    | d(pC) <sub>8</sub>  | 0.69   | -                   | -      |
| d(pT) <sub>9</sub>       | 0.15    | d(pA) <sub>9</sub>  | 0.065   | d(pC) <sub>9</sub>  | 0.4    | -                   | -      |
| d(pT) <sub>10</sub>      | 0.23    | d(pA) <sub>10</sub> | 0.03    | d(pC) <sub>10</sub> | 0.3    | d(pG) <sub>10</sub> | 0.04   |
| d(pT) <sub>11</sub>      | 0.052   | d(pA) <sub>11</sub> | 0.015   | d(pC) <sub>11</sub> | 0.2    | -                   | -      |
| d(pT) <sub>12</sub>      | 0.18    | d(pA) <sub>12</sub> | 0.008   | d(pC) <sub>12</sub> | 0.13   | -                   | -      |
| d(pT) <sub>15</sub>      | 0.005   | d(pA) <sub>15</sub> | 0/0012  | d(pC) <sub>13</sub> | 0.07   | d(pG) <sub>15</sub> | 0.0014 |
| d(pT) <sub>16</sub>      | 0.0025  | d(pA) <sub>16</sub> | 0.0006  | d(pC) <sub>15</sub> | 0.027  | -                   | -      |
| d(pT) <sub>17</sub>      | 0.0014  | -                   | -       | d(pC) <sub>17</sub> | 0.012  | -                   | -      |
| d(pT) <sub>18</sub>      | 0.0009  | -                   | -       | d(pC) <sub>19</sub> | 0.0045 | -                   | -      |
| d(pT) <sub>19</sub>      | 0.0005  | -                   | -       | d(pC) <sub>21</sub> | 0.005  | -                   | -      |
| d(pT) <sub>20</sub>      | 0.00045 | d(pA) <sub>20</sub> | 0.00008 | -                   | -      | -                   | -      |
| d(pT) <sub>23</sub>      | 0.0005  | -                   | -       | -                   | -      | -                   | -      |
| d(pT) <sub>25</sub>      | 0.00055 | d(pA) <sub>25</sub> | 0.00008 | -                   | -      | -                   | -      |

\*The error in determining the value of  $K_m$  did not exceed 7-10%

#### References:

1. Nevinskii, G.A.; Levina, A.S.; Podust, V.N.; Lavrik, O.I. Eukaryotic and prokaryotic DNA-polymerase. II. The role of internucleotide phosphate groups of a template in its binding with the enzyme. *Bioorg. Khim.* **1987**, *13*, 58-68.
2. Volchkova, V.A.; Gorn, V.V.; Kolocheva, T.I.; Lavrik, O.I.; Levina, A.S. Klenow fragment of DNA-polymerase I from E. coli. III. The role of internucleotide phosphate groups of the matrix in its binding with the enzyme. *Bioorg. Khim.* **1989**, *15*, 78-89.
3. Kolocheva, T.I.; Nevinsky, G.A.; Volchkova, V.A., Levina, A.S., Khomov, V.V., Lavrik O.I. DNA polymerase I (Klenow fragment): role of the structure and length of a template in enzyme recognition. *FEBS Lett.* **1989**, *248*, 97-100.
4. Kolocheva, T.I.; Nevinsky, G.A.; Levina, A.S.; Khomov, V.V., Lavrik, O.I. The mechanism of recognition of templates by DNA polymerases from pro- and eukaryotes as revealed by affinity modification data. *J. Biomol. Struct. Dyn.* **1991**, *9*, 169-186.

## Supplementary Table S2

$K_m$  values for primers of different structure and lengths complementary to corresponding templates in the reaction catalyzed by DNA polymerase 1 (Klenow fragment)

| $K_m$ , $\mu\text{M}$ |      |                     |      |                     |       |                     |       |
|-----------------------|------|---------------------|------|---------------------|-------|---------------------|-------|
| dTMP                  | 45.0 | dAMP                | 71.0 | dCMP                | 360.0 | dGMP                | 43.0  |
| d(pT) <sub>2</sub>    | 23.0 | d(pA) <sub>2</sub>  | 35.0 | d(pC) <sub>2</sub>  | 148.0 | d(pG) <sub>2</sub>  | 17.5  |
| d(pT) <sub>3</sub>    | 15.0 | d(pA) <sub>3</sub>  | -    | d(pC) <sub>3</sub>  | 60.   | d(pG) <sub>3</sub>  | 7.1   |
| d(pT) <sub>4</sub>    | 8.0  | d(pA) <sub>4</sub>  | 12.3 | d(pC) <sub>4</sub>  | 24.0  | d(pG) <sub>4</sub>  | 2.9   |
| d(pT) <sub>5</sub>    | 4.2  | d(pA) <sub>5</sub>  | -    | d(pC) <sub>5</sub>  | 10.0  | d(pG) <sub>5</sub>  | 1.2   |
| d(pT) <sub>6</sub>    | 2.5  | d(pA) <sub>6</sub>  | 4.3  | d(pC) <sub>6</sub>  | -     | d(pG) <sub>6</sub>  | -     |
| d(pT) <sub>7</sub>    | 1.4  | d(pA) <sub>7</sub>  | -    | d(pC) <sub>7</sub>  | 2.0   | d(pG) <sub>7</sub>  | 0.2   |
| d(pT) <sub>8</sub>    | 0.65 | d(pA) <sub>8</sub>  | 1.0  | d(pC) <sub>8</sub>  | -     | d(pG) <sub>8</sub>  | -     |
| d(pT) <sub>9</sub>    | 0.45 | d(pA) <sub>9</sub>  | 0.56 | d(pC) <sub>9</sub>  | 0.35  | d(pG) <sub>9</sub>  | -     |
| d(pT) <sub>10</sub>   | 0.23 | d(pA) <sub>10</sub> | 0.31 | d(pC) <sub>10</sub> | 0.14  | d(pG) <sub>10</sub> | 0.013 |
| d(pT) <sub>11</sub>   | 0.16 | d(pA) <sub>11</sub> | 0.35 | d(pC) <sub>11</sub> | -     | d(pG) <sub>11</sub> | -     |
| d(pT) <sub>12</sub>   | 0.18 | d(pA) <sub>12</sub> | 0.18 | d(pC) <sub>12</sub> | -     | d(pG) <sub>12</sub> | -     |
| d(pT) <sub>15</sub>   | 0.1  | d(pA) <sub>15</sub> | 0.06 | d(pC) <sub>15</sub> | 0.58  | d(pG) <sub>15</sub> | 0.022 |

The error in determining the value of  $K_m$  did not exceed 7-10%

### References:

1. Nevinsky, G.A.; Veniaminova, A.G.; Levina, A.S.; Podust, V.N.; Lavrik, O.I.; Holler E. Structure-function analysis of mononucleotides and short oligonucleotides in the priming of enzymatic DNA synthesis. *Biochemistry* **1990**, 29, 1200-1207.
2. Kolocheva, T.I.; Nevinsky, G.A.; Levina, A.S.; Khomov, V.V., Lavrik, O.I. The mechanism of recognition of templates by DNA polymerases from pro- and eukaryotes as revealed by affinity modification data. *J. Biomol. Struct. Dyn.* **1991**, 9, 169-186

### Supplementary Table S3

$K_d$  values for oligonucleotides of different structure and lengths interacting with human uracil DNA glycosylase

| $K_d, \mu\text{M}$  |       |                     |                                                                    |                                           |       |
|---------------------|-------|---------------------|--------------------------------------------------------------------|-------------------------------------------|-------|
| Ligand              |       | Ligand              |                                                                    | Ligand                                    | -     |
| dTMP                | 45000 | dAMP                | 10000                                                              | dTMP                                      | 45000 |
| d(pT) <sub>2</sub>  | 26000 | d(pA) <sub>2</sub>  | 6500                                                               | d(pA) <sub>2</sub> × d(pT) <sub>2</sub>   | 32000 |
| d(pT) <sub>3</sub>  | -     | d(pA) <sub>3</sub>  | 2000                                                               | -                                         | -     |
| d(pT) <sub>4</sub>  | 870   | d(pA) <sub>4</sub>  | -                                                                  | d(pA) <sub>4</sub> × d(pT) <sub>4</sub>   | 6300  |
| d(pT) <sub>5</sub>  | -     | d(pA) <sub>5</sub>  | -                                                                  | -                                         | -     |
| d(pT) <sub>6</sub>  | 320   | d(pA) <sub>6</sub>  | 500                                                                | d(pA) <sub>6</sub> × d(pT) <sub>6</sub>   | 1400  |
| d(pT) <sub>7</sub>  | -     | d(pA) <sub>7</sub>  | -                                                                  | -                                         | -     |
| d(pT) <sub>8</sub>  | 140   | d(pA) <sub>8</sub>  | 100                                                                | d(pA) <sub>8</sub> × d(pT) <sub>8</sub>   | 320   |
| d(pT) <sub>9</sub>  | -     | d(pA) <sub>9</sub>  | -                                                                  | d(pA) <sub>9</sub> × d(pT) <sub>9</sub>   | 220   |
| d(pT) <sub>10</sub> | 25    | d(pA) <sub>10</sub> | 30                                                                 | d(pA) <sub>10</sub> × d(pT) <sub>10</sub> | 56    |
| d(pT) <sub>11</sub> | -     | d(pA) <sub>11</sub> | 36                                                                 | -                                         | -     |
| d(pT) <sub>12</sub> | 25    | d(pA) <sub>12</sub> | 35                                                                 | d(pA) <sub>12</sub> × d(pT) <sub>12</sub> | 60    |
| d(pT) <sub>14</sub> | 26    | d(pA) <sub>15</sub> | 35                                                                 | d(pA) <sub>14</sub> × d(pT) <sub>14</sub> | 60    |
| d(pT) <sub>24</sub> | 25    | d(pA) <sub>16</sub> | 35                                                                 | d(pA) <sub>24</sub> × d(pT) <sub>24</sub> | 58    |
| -                   | -     | -                   | d(pA) <sub>10</sub> × d(pT) <sub>4</sub> -d(pU)-d(pT) <sub>4</sub> |                                           | 7.0   |

The error in determining the value of  $K_m$  did not exceed 7-10%

#### References:

1. Vinogradova, N.L.; Iamkovoï, V.I.; Tsvetkov, I.V.; Nevinskii, G.A. Interaction of uracil-DNA-glycosylase from human placenta with single-stranded deoxy- and oligoribonucleotides and their complexes. *Mol. Biol. (Mosk)* **1996**, *30*, 209-219.
2. Vinogradova, N.L.; Bulychev, N.V.; Maksakova, G.A., Johnson, F.; Nevinsky, G.A. Uracil-DNA glycosylase: interpretation of X-ray data in the light of kinetic and thermodynamic studies. *Mol. Biol. (Moscow)* **1998**, *32*, 489–499.
3. Vinogradova, N.L.; Nevinsky, G.A. Enzymes of direct, excision, and corrected systems of repair of higher and lower organisms and their biological roles. *Mol. Biol. (Mosk)* **2003**, *37*, 944-960.

### Supplementary Table S4

Affinity ( $K_d$ ) of bases, nucleosides, NMPs and dNMPs and other small ligands for Fpg from *Escherichia coli*.

| Ligand                           | $K_d$ , mM* | Ligand | $K_d$ , mM* |
|----------------------------------|-------------|--------|-------------|
| NaH <sub>2</sub> PO <sub>4</sub> | 10          | -      | -           |
| Deoxyribose                      | 157         | Ribose | >133        |
| d(pR)                            | 8.3         | pR     | 10          |
| C-base                           | 48.3        | -      | -           |
| T-base                           | 46.7        | -      | -           |
| A-base                           | 20          | -      | -           |
| G-base                           | 18.3        | -      | -           |
| dTMP                             | 8.3         | UMP    | 6.7         |
| dCMP                             | 8.3         | CMP    | 8.3         |
| dAMP                             | 3.3         | AMP    | 8.7         |
| dGMP                             | 3.3         | GMP    | 8.0         |
| oxo-dGMP                         | 0.7         | -      | -           |

\*Error in  $K_d$  determination was 10-20%. average results of 3-4 measurements are given.

#### References:

1. Ishchenko, A.A.; Bulychev, N.V.; Maksakova, G.A.; Johnson, F.; Nevinsky, G.A. Recognition and conversion of single- and double-stranded oligonucleotide substrates by 8-oxoguanine-DNA glycosylase from *Escherichia coli*. *Biochemistry (Moscow)* **1997**, *62*, 204-211.
2. Ishchenko, A.A.; Bulychev, N.V.; Maksakova, G.A.; Johnson, F.; Nevinsky, G.A. Interaction of *Escherichia coli* 8-oxoguanine-DNA glycosylase with single-stranded oligodeoxyribonucleotides and their complexes. *Mol. Biol. (Moscow)* **1998**, *32*, 454-462.
3. Ishchenko, A.A.; Koval, V.V.; Fedorova, O.S.; Douglas, K.T.; Nevinsky, G.A. Structural requirements of double and single stranded DNA substrates and inhibitors, including a photoaffinity label, of Fpg protein from *E. coli*. *J. Biomol. Struct. Dyn.* **1999**, *17*, 301-310.
4. Ishchenko, A.A.; Vasilenko, N.L.; Sinitsina, O.I.; Yamkovoy, V.I.; Fedorova, O.S.; Douglas, K.T.; Nevinsky, G.A. Thermodynamic, kinetic, and structural basis for recognition and repair of 8-oxoguanine in DNA by Fpg protein from *E. coli*. *Biochemistry* **2002**, *41*, 7540-7548.

**Supplementary Table S5.**

**Affinities of d(pN)<sub>n</sub> deoxyribooligonucleotides ( $K_d$ ) and their derivatives for Fpg from *Escherichia coli***

| Ligands                             | $K_d$ . mM* | Oligos                 | $K_d$ . mM | $K_M$ . mM <sup>#</sup> | Oligos                  | $K_d$ . mM. |
|-------------------------------------|-------------|------------------------|------------|-------------------------|-------------------------|-------------|
| d(pA) <sub>2</sub>                  | 2.7         | d(pT) <sub>2</sub>     | 3.3        | -                       | d(pC) <sub>2</sub>      | 5.0         |
| d(pA) <sub>3</sub>                  | 1.7         | d(pT) <sub>3</sub>     | 1.7        | -                       | -                       | -           |
| d(pA) <sub>4</sub>                  | 1.3         | d(pT) <sub>4</sub>     | 1.3        | -                       | d(pC) <sub>5</sub>      | 0.83        |
| d(pA) <sub>6</sub>                  | 0.77        | d(pT) <sub>6</sub>     | 0.58       | -                       | d(pC) <sub>7</sub>      | 0.5         |
| d(pA) <sub>8</sub>                  | 0.25        | d(pT) <sub>8</sub>     |            | -                       | d(pC) <sub>9</sub>      | 0.17        |
| d(pA) <sub>10</sub>                 | 0.083       | d(pT) <sub>10</sub>    | 0.11       | -                       | d(pC) <sub>10</sub>     | 0.1         |
| d(pA) <sub>11</sub>                 | 0.083       | d(pT) <sub>12</sub>    | 0.066      | -                       | d(pC) <sub>12</sub>     | 0.093       |
| d(pA) <sub>14</sub>                 | 0.083       | d(pT) <sub>14</sub>    | 0.05       | -                       | d(pC) <sub>14</sub>     | 0.083       |
| d(pA) <sub>16</sub>                 | 0.083       | d(pT) <sub>16</sub>    | 0.033      | -                       | -                       | -           |
| d(pA) <sub>20</sub>                 | 0.07        | d(pT) <sub>20</sub>    | 0.033      | -                       | -                       | -           |
| -                                   | -           | d(pT) <sub>23</sub>    | 0.030      | -                       | -                       | -           |
| d[A(pF) <sub>2</sub> ] <sup>*</sup> | 2.7         | d[T(pF) <sub>2</sub> ] | 3.3        | -                       | d[(pF) <sub>9</sub> pT] | 0.083       |
| G11**                               | 0.01        | OG11**                 | 0.0021     | 0.001                   | -                       | -           |
| G6                                  | 0.01        | OG6                    | 0.002      | 0.001                   | -                       | -           |
| C11                                 | 0.006       | OG5                    | -          | 0.0012                  | -                       | -           |
| C3                                  | 0.01        | OG4                    | -          | 0.0011                  | -                       | -           |
| C2                                  | 0.01        | OG3                    | -          | 0.001                   | -                       | -           |
| C1                                  | 0.01        | OG2                    | 0.0005     | 0.0013                  | -                       | -           |
|                                     |             | OG1                    | 0.002      | 0.00075                 |                         |             |

\*Error in  $K_M$ .  $K_d$  values determinations was 10-20%: average results of 3-4 measurements are given; <sup>\*</sup>(F) is a chemically stable analog of deoxyribose (the tetrahydrofuran derivative).

\*\*The sequences of specific 23-mer single stranded ODNs (OG oligonucleotides). where **G\*** is oxoG (G is simple G) and complementary to them C oligonucleotides were used:

OG1 - **G\***CTCTCCCTTCCTCCTTTCCTCT; OG2 - **CG\***TCTCCCTTCCTCCTTTCCTCT;  
 OG3 - **CTG\***CTCCCTTCCTCCTTTCCTCT; OG4 - **CTCG\***TCCCTTCCTCCTTTCCTCT;  
 OG5 - **CTCTG\***CCCTTCCTCCTTTCCTCT; OG6 - **CTCTCG\***CCTTCCTCCTTTCCTCT;  
 OG11 - **CTCTCCCTTCG\***CTCCTTTCCTCT; G6 - **CTCTCGCCTTCCTCCTTTCCTCT**;  
 G11 - **CTCTCCCTTCGCTCCTTTCCTCT**;

**References:**

1. Ishchenko, A.A.; Bulychev, N.V.; Maksakova, G.A.; Johnson, F.; Nevinsky, G.A. Interaction of *Escherichia coli* 8-oxoguanine-DNA glycosylase with single-stranded oligodeoxyribonucleotides and their complexes. *Mol. Biol. (Moscow)* **1998**, *32*, 454-462.
2. Ishchenko, A.A.; Koval, V.V.; Fedorova, O.S.; Douglas, K.T.; Nevinsky, G.A. Structural requirements of double and single stranded DNA substrates and inhibitors, including a photoaffinity label, of Fpg protein from *E. coli*. *J. Biomol. Struct. Dyn.* **1999**, *17*, 301-310.
3. Ishchenko, A.A.; Vasilenko, N.L.; Sinitsina, O.I.; Yamkovoy, V.I.; Fedorova, O.S.; Douglas, K.T.; Nevinsky, G.A. Thermodynamic, kinetic, and structural basis for recognition and repair of 8-oxoguanine in DNA by Fpg protein from *E. coli*. *Biochemistry* **2002**, *41*, 7540-7548.

**Supplementary Table S6.**

**Affinities ( $K_d$  and  $K_M$ ) of mixtures and duplexes of oligonucleotides for Fpg from**

*Escherichia coli*\*

| Mixture or duplex                            | $K_d$ , $\mu\text{M}^{***}$ | $K_M$ , $\mu\text{M}^*$ | $V_{max}$ , % |
|----------------------------------------------|-----------------------------|-------------------------|---------------|
| <b>d(pT)<sub>2</sub>+d(pA)<sub>2</sub></b>   | <b>1966</b>                 | -                       | -             |
| <b>d(pT)<sub>3</sub>+d(pA)<sub>3</sub></b>   | <b>1500</b>                 | -                       | -             |
| <b>d(pT)<sub>4</sub>+d(pA)<sub>4</sub></b>   | <b>1100</b>                 | -                       | -             |
| <b>d(pT)<sub>6</sub>+d(pA)<sub>6</sub></b>   | <b>267</b>                  | -                       | -             |
| <b>d(pT)<sub>8</sub>-d(pA)<sub>8</sub></b>   | <b>30</b>                   | -                       | -             |
| <b>d(pT)<sub>10</sub>-d(pA)<sub>10</sub></b> | <b>6.7</b>                  | -                       | -             |
| <b>d(pT)<sub>12</sub>-d(pA)<sub>12</sub></b> | <b>2.0</b>                  | -                       | -             |
| <b>d(pT)<sub>14</sub>-d(pA)<sub>14</sub></b> | <b>0.3</b>                  | -                       | -             |
| <b>d(pT)<sub>15</sub>-d(pA)<sub>15</sub></b> | <b>0.3</b>                  | -                       | -             |
| <b>d(pT)<sub>16</sub>-d(pA)<sub>16</sub></b> | <b>0.67</b>                 | -                       | -             |
| <b>d(pT)<sub>20</sub>-d(pA)<sub>20</sub></b> | <b>1.0</b>                  | -                       | -             |
| <b>G2-C2**</b>                               | <b>0.07</b>                 | -                       | -             |
| <b>G11-C11</b>                               | <b>0.067</b>                | -                       | -             |
| <b>OG1-C1</b>                                | <b>0.0067</b>               | <b>0.06</b>             | <b>0.04</b>   |
| <b>OG2-C2</b>                                | <b>0.01</b>                 | <b>0.016</b>            | <b>0.44</b>   |
| <b>OG3-C3</b>                                | -                           | <b>0.015</b>            | <b>31.0</b>   |
| <b>OG5-C5</b>                                | -                           | <b>0.01</b>             | <b>10.0</b>   |
| <b>OG6-C6</b>                                | -                           | <b>0.008</b>            | <b>100</b>    |
| <b>OG11-C11</b>                              | <b>0.006</b>                | <b>0.006</b>            | <b>100</b>    |
| <b>OG20-C20</b>                              | -                           | <b>0.006</b>            | <b>0.1</b>    |
| <b>OG21-C21</b>                              | -                           | <b>40.0</b>             | <b>0.03</b>   |

\*Errors in  $K_M$ ,  $K_d$  values determinations was 10-30%: average results of 3-4 measurements are given.

\*\**Oligonucleotides used.* The sequences of specific 23-mer ODNs (OG oligonucleotides), where G\* is oxoG and complementary to them C oligonucleotides were used:

OG1 - G\*CTCTCCCTTCCTCCTTTTCCTCT; OG2 - CG\*TCTCCCTTCCTCCTTTTCCTCT;  
 OG3 - CTG\*CTCCCTTCCTCCTTTTCCTCT; OG4 - CTCG\*TCCCTTCCTCCTTTTCCTCT;  
 OG5 - CTCTG\*CCCTTCCTCCTTTTCCTCT; OG6 - CTCTCG\*CCTTCCTCCTTTTCCTCT;  
 OG11 -CTCTCCCTTCG\*CTCCTTTTCCTCT; OG20-CCTCTCCCTTCCTCCTTTTC G\*TCT  
 OG21-CCTCTCCCTTCCTCCTTTTCG\*CT; G6 - CTCTCGCCTTCCTCCTTTTCCTCT;  
 G11 - CTCTCCCTTCGCTCCTTTTCCTCT.

**References:**

- Ishchenko, A.A.; Bulychev, N.V.; Maksakova, G.A.; Johnson, F.; Nevinsky, G.A. Interaction of *Escherichia coli* 8-oxoguanine-DNA glycosylase with single-stranded oligodeoxyribonucleotides and their complexes. *Mol. Biol. (Moscow)* **1998**, *32*, 454-462.
- Ishchenko, A.A.; Vasilenko, N.L.; Sinitsina, O.I.; Yamkovoy, V.I.; Fedorova, O.S.; Douglas, K.T.; Nevinsky, G.A. Thermodynamic, kinetic, and structural basis for recognition and repair of 8-oxoguanine in DNA by Fpg protein from *E. coli*. *Biochemistry* **2002**, *41*, 7540-7548.

### Supplementary Table S7

Affinities ( $K_d$  and  $K_M$ ) of different ligands. single-stranded oligonucleotides and their duplexes for hOGG1\*

| Ligand              | $K_d$ , mM            | Ligand              | $K_d$ , mM            | Ligand              | $K_d$ , mM                 |
|---------------------|-----------------------|---------------------|-----------------------|---------------------|----------------------------|
| P <sub>i</sub>      | $68.0 \times 10^{-3}$ | dGMP                | $6.5 \times 10^{-3}$  | oxo-dGMP            | $1.6 \times 10^{-3}$       |
| dAMP                | $1.5 \times 10^{-3}$  | dTMP                | $2.0 \times 10^{-3}$  | dCMP                | $9.4 \times 10^{-3}$       |
| d(pA) <sub>2</sub>  | $4.4 \times 10^{-3}$  | d(pT) <sub>2</sub>  | $4.8 \times 10^{-3}$  | d(pC) <sub>2</sub>  | $9.0 \times 10^{-3}$       |
| -                   | -                     | d(pT) <sub>4</sub>  | $7.3 \times 10^{-4}$  | d(pC) <sub>4</sub>  | $1.5 \times 10^{-3}$       |
| d(pA) <sub>6</sub>  | $3.7 \times 10^{-4}$  | d(pT) <sub>6</sub>  | $3.7 \times 10^{-4}$  | d(pC) <sub>6</sub>  | $6.0 \times 10^{-4}$       |
| d(pA) <sub>8</sub>  | $9.0 \times 10^{-5}$  | d(pT) <sub>8</sub>  | $1.1 \times 10^{-4}$  | d(pC) <sub>8</sub>  | $1.3 \times 10^{-4}$       |
| d(pA) <sub>9</sub>  | $7.0 \times 10^{-5}$  | d(pT) <sub>10</sub> | $7.7 \times 10^{-5†}$ | d(pC) <sub>10</sub> | $6.7 \times 10^{-5}$       |
| d(pA) <sub>10</sub> | $9.3 \times 10^{-5}$  | d(pT) <sub>11</sub> | $5.3 \times 10^{-5}$  | d(pC) <sub>12</sub> | $3.3 \times 10^{-5}$       |
| -                   | -                     | d(pT) <sub>12</sub> | $3.0 \times 10^{-5}$  | d(pC) <sub>14</sub> | $3.7 \times 10^{-5}$       |
| d(pA) <sub>14</sub> | $3.7 \times 10^{-5}$  | d(pT) <sub>14</sub> | $5.7 \times 10^{-5}$  | G6**                | $2.4 \times 10^{-5}$       |
| d(pA) <sub>16</sub> | $2.0 \times 10^{-5}$  | d(pT) <sub>16</sub> | $4.0 \times 10^{-5}$  | G11**               | $2.0 \times 10^{-5}$       |
| d(pA) <sub>20</sub> | $4.3 \times 10^{-5}$  | d(pT) <sub>20</sub> | $2.3 \times 10^{-5}$  | OG6**               | $K_M = 7.5 \times 10^{-8}$ |
| d(pA) <sub>23</sub> | $2.0 \times 10^{-5}$  | d(pT) <sub>23</sub> | $1.7 \times 10^{-5}$  | OG11**              | $K_M = 8.0 \times 10^{-8}$ |

| Ligand                                    | $K_d$ , $\mu$ M               | Ligand                                   | $K_d$ , $\mu$ M      |
|-------------------------------------------|-------------------------------|------------------------------------------|----------------------|
| d(pT) <sub>6</sub> : d(pA) <sub>6</sub>   | $3.9 \times 10^{-4}$          | d(pT) <sub>14</sub> ×d(pA) <sub>14</sub> | $1.0 \times 10^{-5}$ |
| d(pT) <sub>8</sub> : d(pA) <sub>8</sub>   | $5.7 \times 10^{-5}$          | d(pT) <sub>16</sub> ×d(pA) <sub>16</sub> | $1.0 \times 10^{-5}$ |
| d(pT) <sub>10</sub> : d(pA) <sub>10</sub> | $6.8 \times 10^{-5†}$         | d(pT) <sub>20</sub> ×d(pA) <sub>20</sub> | $9.0 \times 10^{-6}$ |
| d(pT) <sub>12</sub> ×d(pA) <sub>12</sub>  | $3.7 \times 10^{-5}$          | d(pT) <sub>23</sub> ×d(pA) <sub>23</sub> | $1.0 \times 10^{-5}$ |
| OG6×C6                                    | $K_M = 3.0 \times 10^{-8***}$ | G6×C6                                    | $1.1 \times 10^{-5}$ |
| OG11×C11                                  | $K_M = 1.1 \times 10^{-8***}$ | G11×C11                                  | $8.7 \times 10^{-6}$ |
| -                                         | -                             | cOG11×C11                                | $1.0 \times 10^{-6}$ |

\*Errors in  $K_M$ .  $K_d$  values determinations was 10-20%: average results of 3-4 measurements are given.

\*\**Oligonucleotides used.* The sequences of specific 23-mer ODNs (OG oligonucleotides), where G\* is oxoG and complementary to them C oligonucleotides were used:

OG6 - CTCTCG\*CCTTCCTCCTTTCCTCT; OG11 -CTCTCCCTTCG\*CTCCTTTCCTCT;  
G6 - CTCTCGCCTTCCTCCTTTCCTCT; G11 – CTCTCCCTTCGCTCCTTTCCTCT.

#### References:

1. Kirpota, O.O.; Endutkin, A.V.; Ponomarenko, M.P.; Ponomarenko, P.M.; Zharkov, D.O.; Nevinsky, G.A. Thermodynamic and kinetic basis for recognition and repair of 8-oxoguanine in DNA by human 8-oxoguanine-DNA glycosylase. *Nucleic Acids Res.* **2011**, *39*, 4836–4850.

### Supplementary Table S8

#### Affinity of APN1 for minimal ligands. their derivatives. single- and double-stranded homo-deoxy Oligonucleotides

| Ligand                                 | $K_d$ , $\mu\text{M}^{**}$ | Ligand                                   | $K_d$ , $\mu\text{M}^{**}$ | Ligand                                   | $K_d$ , $\mu\text{M}^{**}$ |
|----------------------------------------|----------------------------|------------------------------------------|----------------------------|------------------------------------------|----------------------------|
| $\text{NaH}_2\text{PO}_4$              | 360                        | <i>D</i> -ribose                         | >0.17 M                    | d(pR)                                    | 25                         |
| dAMP                                   | 165                        | dTMP                                     | 163.3                      | dCMP                                     | 163.3                      |
| d(pF)                                  | 59.0                       | dGMP                                     | 166.6                      | -                                        | -                          |
| <b>Single-stranded ODNs</b>            |                            |                                          |                            |                                          |                            |
| d(pA) <sub>2</sub>                     | 50                         | d(pT) <sub>2</sub>                       | 116.6                      | d(pC) <sub>2</sub>                       | 140                        |
| -                                      | -                          | d(pT) <sub>3</sub>                       | 66.7                       | d(pC) <sub>3</sub>                       | 60                         |
| d(pA) <sub>4</sub>                     | 33.3                       | d(pT) <sub>4</sub>                       | 45                         | -                                        | -                          |
| -                                      | -                          | -                                        | -                          | d(pC) <sub>5</sub>                       | 21.7                       |
| d(pA) <sub>6</sub>                     | 17.2                       | d(pT) <sub>6</sub>                       | 24.6                       | -                                        | -                          |
| -                                      | -                          | -                                        | -                          | d(pC) <sub>7</sub>                       | 10                         |
| d(pA) <sub>8</sub>                     | 2.5                        | d(pT) <sub>8</sub>                       | 8.3                        | -                                        | -                          |
| -                                      | -                          | -                                        | -                          | d(pC) <sub>9</sub>                       | 4.7                        |
| d(pA) <sub>10</sub>                    | 1.66                       | d(pT) <sub>10</sub>                      | 2.5                        | d(pC) <sub>10</sub>                      | 3.33                       |
| -                                      | -                          | d(pT) <sub>11</sub>                      | 2.5                        | d(pC) <sub>11</sub>                      | 3.33                       |
| d(pA) <sub>12</sub>                    | 1.7                        | d(pT) <sub>12</sub>                      | 2.5                        | -                                        | -                          |
| -                                      | -                          | -                                        | -                          | d(pC) <sub>13</sub>                      | 3.33                       |
| d(pA) <sub>14</sub>                    | 1.7                        | d(pT) <sub>14</sub>                      | 2.5                        | -                                        | -                          |
| -                                      | -                          | d(pT) <sub>15</sub>                      | 2.57                       | -                                        | -                          |
| d(pA) <sub>16</sub>                    | 1.66                       | -                                        | -                          | -                                        | -                          |
| d[(pF) <sub>3</sub> pT]**              | 11.7                       | d(pG) <sub>2</sub>                       | 102                        | -                                        | -                          |
| d[(pF) <sub>5</sub> pT]                | 5.2                        | d(pG) <sub>4</sub>                       | 38.3                       | -                                        | -                          |
| d[(pF) <sub>7</sub> pT]                | 2.3                        | d(pG) <sub>6</sub>                       | 14.4                       | -                                        | -                          |
| d[(pF) <sub>9</sub> pT]                | 1.0                        | d(pG) <sub>8</sub>                       | 5.4                        | -                                        | -                          |
| <b>Double-stranded ODNs</b>            |                            |                                          |                            |                                          |                            |
| d(pA) <sub>2</sub> ·d(pT) <sub>2</sub> | 36.6                       | d(pA) <sub>8</sub> ·d(pT) <sub>8</sub>   | 9.3                        | d(pA) <sub>14</sub> ·d(pT) <sub>14</sub> | 0.33                       |
| d(pA) <sub>4</sub> ·d(pT) <sub>4</sub> | 26.6                       | d(pA) <sub>10</sub> ·d(pT) <sub>10</sub> | 0.33                       | d(pA) <sub>16</sub> ·d(pT) <sub>16</sub> | 0.33                       |
| d(pA) <sub>6</sub> ·d(pT) <sub>6</sub> | 11.8                       | d(pA) <sub>12</sub> ·d(pT) <sub>12</sub> | 0.36                       | d(pA) <sub>20</sub> ·d(pT) <sub>20</sub> | 0.33                       |

\*Standard error in experimentally determined  $K_d$  values was 10–20%; mean of 3–4 measurements are given.

\*\*F is tetrahydrofuran – chemically stable analog of abasic site.

#### References:

1. Beloglazova, N.G.; Kirpota, O.O.; Starostin, K.V.; Ishchenko, A.A.; Yamkovoy, V.I.; Zharkov, D.O.; Douglas, K.T.; Nevinsky, G.A. Thermodynamic, kinetic and structural basis for recognition and repair of abasic sites in DNA by apurinic/aprimidinic endonuclease from human placenta. *Nucleic Acids Res.* **2004**, *32*, 5134–5146.



**Supplementary Table S9**

**Affinity of APN1 for specific and unspecific hetero-deoxy ODNs and their duplexes**

| Sequences                                                               | $K_d$ , $\mu\text{M}^{**}$ | $K_d(\text{ss}):$<br>$K_d(\text{ds})$ |
|-------------------------------------------------------------------------|----------------------------|---------------------------------------|
| <b>Nonspecific ss heterooligonucleotides</b>                            |                            |                                       |
| ss dp(CTCCCTTCCT)                                                       | 3.1±0.3                    | -                                     |
| ss dp(CTCACACACT)                                                       | 2.6±0.3                    | -                                     |
| ss dp(GAAGAGAAGA)                                                       | 2.2±0.4                    | -                                     |
| ss dp(CTAGTCAACA) <sup>†</sup>                                          | 2.6±0.3                    | -                                     |
| ss d[(pT) <sub>7</sub> pC(pT) <sub>6</sub> ]                            | 2.5±0.3                    | 3.0                                   |
| ds d[(pT) <sub>7</sub> pC(pT) <sub>6</sub> ]·d(pA) <sub>14</sub>        | 0.83±0.1                   |                                       |
| ss d[(pT) <sub>7</sub> pG(pT) <sub>6</sub> ]                            | 3.0±0.3                    | 2.0                                   |
| ds d[(pT) <sub>7</sub> pG(pT) <sub>6</sub> ]·d(pA) <sub>14</sub>        | 1.5±0.2                    |                                       |
| ss d[(pT) <sub>7</sub> pR(pT) <sub>6</sub> ]                            | 0.39± 0.2                  | 3.0                                   |
| ds d[(pT) <sub>7</sub> pR(pT) <sub>6</sub> ]·d(pA) <sub>14</sub>        | 0.13±0.15                  |                                       |
| ss d[(pT) <sub>7</sub> pF(pT) <sub>6</sub> ]                            | 0.5±0.1                    | 3.0                                   |
| ds d[(pT) <sub>7</sub> pF(pT) <sub>6</sub> ]·d(pA) <sub>14</sub>        | 0.16±0.03                  |                                       |
| ss d(CTAGTCAACACTGTCTGTGGATAC)                                          | 2.1±0.3                    | 4.2                                   |
| ds d(CTAGTCAACACTGTCTGTGGATAC)                                          | 0.5±0.1                    |                                       |
| Specific ODN containing R abasic site<br>ss d(CTAGTCARCACTGTCTGTGGATAC) | 0.35±0.3                   | 2.7                                   |
| Specific ODN containing R abasic site<br>ds d(CTAGTCARCACTGTCTGTGGATAC) | 0.13±0.05                  |                                       |

\*Standard error in experimentally determined  $K_d$  values was 10–20%; mean of 3–4 measurements are given.

**References:**

Beloglazova, N.G.; Kirpota, O.O.; Starostin, K.V.; Ishchenko, A.A.; Yamkovoy, V.I.; Zharkov, D.O.; Douglas, K.T.; Nevinsky, G.A. Thermodynamic, kinetic and structural basis for recognition and repair of abasic sites in DNA by apurinic/aprimidinic endonuclease from human placenta. *Nucleic Acids Res.* **2004**, *32*, 5134–5146.

**Supplementary Table S10****Affinity of different single-stranded oligonucleotides for the first DNA-binding site of Rec A protein from *E. coli*.**

| Ligand                               | $K_d$ , M            | Ligand              | $K_d$ , M             |
|--------------------------------------|----------------------|---------------------|-----------------------|
| $\text{PO}_4^{3-}$                   | 0.5                  | d(pR)               | 0.6                   |
| dTMP                                 | $2.0 \times 10^{-2}$ | dCMP                | $12.8 \times 10^{-3}$ |
| d(pT) <sub>2</sub>                   | $4.0 \times 10^{-2}$ | d(pC) <sub>2</sub>  | $4.7 \times 10^{-2}$  |
| d(pT) <sub>3</sub>                   | $7.9 \times 10^{-3}$ | d(pC) <sub>4</sub>  | $1.1 \times 10^{-2}$  |
| d(pT) <sub>4</sub>                   | $1.0 \times 10^{-2}$ | d(pC) <sub>6</sub>  | $2.5 \times 10^{-3}$  |
| d(pT) <sub>5</sub>                   | $5.0 \times 10^{-3}$ | d(pC) <sub>8</sub>  | $5.7 \times 10^{-4}$  |
| d(pT) <sub>6</sub>                   | $2.5 \times 10^{-3}$ | d(pC) <sub>10</sub> | $5.0 \times 10^{-4}$  |
| d(pT) <sub>8</sub>                   | $5.0 \times 10^{-4}$ | d(pC) <sub>12</sub> | $4.3 \times 10^{-5}$  |
| d(pT) <sub>10</sub>                  | $2.0 \times 10^{-4}$ | d(pC) <sub>16</sub> | $1.8 \times 10^{-6}$  |
| d(pT) <sub>12</sub>                  | $3.5 \times 10^{-5}$ | d(pC) <sub>20</sub> | $1.6 \times 10^{-7}$  |
| d(pT) <sub>14</sub>                  | $8.3 \times 10^{-6}$ | -                   | -                     |
| d(pT) <sub>16</sub>                  | $1.5 \times 10^{-6}$ | dAMP                | $12.4 \times 10^{-3}$ |
| d(pT) <sub>20</sub>                  | $1.0 \times 10^{-7}$ | d(pA) <sub>2</sub>  | $4.5 \times 10^{-2}$  |
| d(pT) <sub>30</sub>                  | $2.3 \times 10^{-8}$ | d(pA) <sub>4</sub>  | $7.0 \times 10^{-3}$  |
| d(pT) <sub>40</sub>                  | $7.0 \times 10^{-9}$ | d(pA) <sub>6</sub>  | $1.04 \times 10^{-3}$ |
| d(T) <sub>8</sub>                    | $4.8 \times 10^{-3}$ | d(pA) <sub>8</sub>  | $5.2 \times 10^{-4}$  |
| d(Tp) <sub>8</sub>                   | $2.5 \times 10^{-3}$ | d(pA) <sub>10</sub> | $2.5 \times 10^{-4}$  |
| d(pTT(R) <sub>17</sub> T)            | $9.5 \times 10^{-6}$ | d(pA) <sub>12</sub> | $1.3 \times 10^{-4}$  |
| [d(pT) <sub>10</sub> ] <sub>et</sub> | $5.0 \times 10^{-3}$ | d(pA) <sub>14</sub> | $8.0 \times 10^{-5}$  |
| d(T) <sub>8</sub>                    | $4.8 \times 10^{-3}$ | d(pA) <sub>16</sub> | $5.4 \times 10^{-5}$  |
| -                                    | -                    | d(pA) <sub>18</sub> | $3.2 \times 10^{-5}$  |
| -                                    | -                    | d(pA) <sub>20</sub> | $2.4 \times 10^{-5}$  |

\*Standard error in experimentally determined  $K_d$  values was 10–20%; mean of 3 measurements are given.

**References:**

1. Bugreeva, I.P.; Bugreev, D.V.; Nevinsky, G.A.. Formation of nucleoprotein RecA filament on single-stranded DNA: Analysis by stepwise increase in ligand complexity. *FEBS J.* **2005**, *272*, 2734–2745.
2. Bugreeva, I.P.; Bugreev, D.V.; Nevinskii, G.A. Physico-chemical basis of RecA nucleoprotein filament formation on single. *Mol. Biol. (Mosk)* **2005**, *39*, 984-998.
3. Bugreeva, I.P.; Bugreev, D.V., Nevinskii, G.A. Interaction of single-stranded DNA with the second DNA-binding site of RecA nucleoprotein filament. *Mol. Biol. (Mosk)* **2007**, *41*, 524-534.

### Supplementary Table S11

#### Maximum ATP hydrolysis values by the RecA protein in the presence of various polydeoxyribonucleotides

| <b>Polymeric DNA</b> | <b>Maximum ATP hydrolysis.%</b> | <b>Polymeric DNA</b> | <b>Maximum ATP hydrolysis.%</b> |
|----------------------|---------------------------------|----------------------|---------------------------------|
| <b>poly(dA)</b>      | <b>1.6</b>                      | <b>poly(dG)</b>      | <b>3.5</b>                      |
| <b>poly(dAT)</b>     | <b>33.2</b>                     | <b>poly(dIT)</b>     | <b>63.4</b>                     |
| <b>poly(dAC)</b>     | <b>59.4</b>                     | <b>poly(dIX)</b>     | <b>43.4</b>                     |
| <b>poly(dAG)</b>     | <b>1.3</b>                      | <b>poly(dTX)</b>     | <b>63.6</b>                     |
| <b>poly(dC)</b>      | <b>63.1</b>                     | <b>poly(dXU)</b>     | <b>62.1</b>                     |
| <b>poly(dGC)</b>     | <b>1.5</b>                      | <b>poly(dU)</b>      | <b>63.0</b>                     |
| <b>poly(dT)</b>      | <b>61.0</b>                     | <b>poly(dI)</b>      | <b>24.3</b>                     |
| <b>poly(dTG)</b>     | <b>58.5</b>                     | <b>poly(dX)</b>      | <b>28.4</b>                     |

\*Standard error in experimentally determined *hydrolysis* was 7-10 %; mean of 3 measurements are given.

#### References:

Bugreeva, I.P.; Bugreev, D.V., Nevinskii, G.A. Interaction of single-stranded DNA with the second DNA-binding site of RecA nucleoprotein filament. *Mol. Biol. (Mosk)* **2007**, *41*, 524-534.

**Supplementary Table S12**

**Affinity of different unspecific single-stranded and double-stranded oligonucleotides for *EcoRI* endonuclease**

| Ligand                              | $K_d \cdot \mu\text{M}$ | Ligand                    | $IK_d \cdot \mu\text{M}$ | Ligand                                               | $K_d \cdot \mu\text{M}$ |
|-------------------------------------|-------------------------|---------------------------|--------------------------|------------------------------------------------------|-------------------------|
| <b>KH<sub>2</sub>PO<sub>4</sub></b> | <b>31000</b>            | -                         | -                        | <b>[(C<sub>2</sub>H<sub>5</sub>O)<sub>3</sub>PO]</b> | <b>740000</b>           |
| <b>Deoxyribozophosphate</b>         | <b>4600</b>             | -                         | -                        | -                                                    | -                       |
| <b>thymine</b>                      | <b>450000</b>           | -                         | -                        | <b>thymidine</b>                                     | <b>65000</b>            |
| <b>TMP</b>                          | <b>2100</b>             | <b>AMP</b>                | <b>2500</b>              |                                                      |                         |
| <b>d(pT)<sub>2</sub></b>            | <b>1200</b>             | <b>d(pA)<sub>2</sub></b>  | <b>1000</b>              | <b>d(pT)<sub>2</sub>×d(pA)<sub>2</sub></b>           | <b>830</b>              |
| <b>d(pT)<sub>3</sub></b>            | <b>480</b>              | -                         | -                        |                                                      |                         |
| <b>d(pT)<sub>4</sub></b>            | <b>360</b>              | <b>d(pA)<sub>4</sub></b>  | <b>250</b>               | <b>d(pT)<sub>4</sub>×d(pA)<sub>4</sub></b>           | <b>290</b>              |
| <b>d[(pR)<sub>3</sub>pT]</b>        | <b>320</b>              | -                         | -                        | -                                                    | -                       |
| <b>d(pT)<sub>6</sub></b>            | <b>63</b>               | <b>d(pA)<sub>6</sub></b>  | <b>83</b>                | <b>d(pT)<sub>6</sub>×d(pA)<sub>6</sub></b>           | <b>110</b>              |
| <b>d(pT)<sub>8</sub></b>            | <b>48</b>               | <b>d(pA)<sub>8</sub></b>  | <b>56</b>                | <b>d(pT)<sub>8</sub>×d(pA)<sub>8</sub></b>           | <b>49</b>               |
| <b>d(pT)<sub>10</sub></b>           | <b>42</b>               | <b>d(pA)<sub>10</sub></b> | <b>52</b>                | <b>d(pT)<sub>10</sub>×d(pA)<sub>10</sub></b>         | <b>23</b>               |
| <b>d[p(Et)T]<sub>10</sub></b>       | <b>390</b>              | -                         | -                        | -                                                    | -                       |
| <b>d[(pR)<sub>9</sub>pT]</b>        | <b>35</b>               | -                         | -                        | -                                                    | -                       |
| <b>d(pT)<sub>11</sub></b>           | <b>40</b>               | -                         | -                        | -                                                    | -                       |
| <b>d(pT)<sub>12</sub></b>           | <b>28</b>               | <b>d(pA)<sub>12</sub></b> | <b>29</b>                | <b>d(pT)<sub>12</sub>×d(pA)<sub>12</sub></b>         | <b>12</b>               |
| -                                   | -                       | <b>d(pA)<sub>14</sub></b> | <b>23</b>                | -                                                    | -                       |
| <b>d(pT)<sub>15</sub></b>           | <b>23</b>               | <b>d(pA)<sub>15</sub></b> | <b>33</b>                | <b>d(pT)<sub>15</sub>×d(pA)<sub>15</sub></b>         | <b>10</b>               |
| <b>d(pT)<sub>16</sub></b>           | <b>17</b>               | <b>d(pA)<sub>20</sub></b> | <b>11</b>                | -                                                    |                         |
| <b>d(CGG)</b>                       | <b>400</b>              | <b>d(AATTC)</b>           | <b>62</b>                | <b>Specific</b>                                      | <b>0.1</b>              |
| <b>d(GGA)</b>                       | <b>290</b>              | <b>d(GAATTC)</b>          | <b>24</b>                | <b>d(CGGAATTC</b>                                    |                         |
| <b>d(AGA)</b>                       | <b>240</b>              | <b>d(CGGAATTC)</b>        | <b>4.5</b>               | <b>CGTACTAC)</b>                                     |                         |
| <b>d(GAC)</b>                       | <b>420</b>              | <b>d(CGGAATTC)</b>        | <b>10</b>                | -                                                    | -                       |

\*Standard error in experimentally determined  $K_d$  values was 10–20%; mean of 3 measurements are given.

**References:**

1. Kolocheva, T.I.; Demidov, S.A.; Maksakova, G.A.; Nevinskii, G.A. Interaction of endonuclease *EcoRI* with short specific and nonspecific oligonucleotides. *Mol, Biol, (Mosk)* **1998**, *32*,1025-1033.
2. Kolocheva, T.I.; Maksakova, G.A.; Bugreev, D,?.; Nevinsky, G,A. Interaction of endonuclease *EcoRI* with short specific and nonspecific oligonucleotides. *IUBMB Life* **2001**, *51*, 189-195.
3. Kubareva, E.A.; Volkov, E.M.; Vinogradova, N.L.; Kanevsky, I.A.; Oretskaya, T.S.; Kuznetsova, S.A.; Brevnov, M.G.; Gromova, E.S.; Nevinsky, G.A.; Shabarova, Z,A. Modified substrates as probes for studing uracil-DNA glycosylase. *Gene* **1995**, *157*, 167-171

### Supplementary Table S13

#### Affinity of different unspecific single-stranded and double-stranded oligonucleotides for HIV-1 integrase

|                                          |                       | $K_d$ , $\mu\text{M}$ |                                                                                                   |                     |                                                                                                    |                         |           |
|------------------------------------------|-----------------------|-----------------------|---------------------------------------------------------------------------------------------------|---------------------|----------------------------------------------------------------------------------------------------|-------------------------|-----------|
| Ligand                                   |                       | Ligand                | -                                                                                                 | Ligand              | -                                                                                                  | Ligand                  | Ligand    |
| T-base                                   | > 500 000             | C-base                | > 500 000                                                                                         | A-base              | > 500 000                                                                                          | d-ribose                | > 500 000 |
| Pi                                       | 33 000                | -                     | -                                                                                                 | -                   | -                                                                                                  | d(pR)                   | 15 000    |
| dTMP                                     | 767                   | dCMP                  | 15 000                                                                                            | dAMP                | 5 000                                                                                              | -                       | -         |
| d(pT) <sub>2</sub>                       | 330                   | d(pC) <sub>2</sub>    | 300                                                                                               | d(pA) <sub>2</sub>  | 80                                                                                                 | -                       | -         |
| d(pT) <sub>3</sub>                       | 166                   | d(pC) <sub>3</sub>    | 100                                                                                               | d(pA) <sub>3</sub>  | 48                                                                                                 | -                       | -         |
| d(pT) <sub>4</sub>                       | 73                    | d(pC) <sub>4</sub>    | 50                                                                                                | d(pA) <sub>4</sub>  | 3.5                                                                                                | d(pR) <sub>3</sub> (T)  | 100       |
| d(pT) <sub>5</sub>                       | 43                    | d(pC) <sub>5</sub>    | 32                                                                                                | d(pA) <sub>6</sub>  | 1.2                                                                                                | -                       | -         |
| d(pT) <sub>6</sub>                       | 33                    | -                     | -                                                                                                 | d(pA) <sub>8</sub>  | 1.0                                                                                                | d(pR) <sub>7</sub> (T)  | 60        |
| d(pT) <sub>7</sub>                       | 26                    | d(pC) <sub>7</sub>    | 10                                                                                                | d(pA) <sub>10</sub> | 0.52                                                                                               | -                       | -         |
| d(pT) <sub>10</sub>                      | 8.3                   | -                     | -                                                                                                 | d(pA) <sub>12</sub> | 0.40                                                                                               | -                       | -         |
| -                                        | -                     | d(pC) <sub>16</sub>   | 0.100                                                                                             | d(pA) <sub>14</sub> | 0.30                                                                                               | d(pR) <sub>13</sub> (T) | 15        |
| d(pT) <sub>21</sub>                      | 1.0                   | d(pC) <sub>21</sub>   | 0.012                                                                                             | d(pA) <sub>21</sub> | 0.016                                                                                              | -                       | -         |
| Ligand                                   | $K_d$ , $\mu\text{M}$ |                       | Ratio : $K_d$ (ss)/ $K_d$ (ds)<br>ss: d(T) <sub>n</sub> /ds: d(T) <sub>n</sub> •d(A) <sub>n</sub> |                     | Ratio : $K_d$ (ss) / $K_d$ (ds)<br>ss: d(A) <sub>n</sub> /ds: d(T) <sub>n</sub> •d(A) <sub>n</sub> |                         |           |
| d(pT) <sub>3</sub> ×d(pA) <sub>3</sub>   | 45                    |                       | 3.6                                                                                               |                     | 1.06                                                                                               |                         |           |
| d(pT) <sub>4</sub> ×d(pA) <sub>4</sub>   | 3.2                   |                       | 23                                                                                                |                     | 1.1                                                                                                |                         |           |
| d(pT) <sub>6</sub> ×d(pA) <sub>6</sub>   | 0.6                   |                       | 55                                                                                                |                     | 2.0                                                                                                |                         |           |
| d(pT) <sub>8</sub> ×d(pA) <sub>8</sub>   | 0.28                  |                       | 57                                                                                                |                     | 3.6                                                                                                |                         |           |
| d(pT) <sub>10</sub> ×d(pA) <sub>10</sub> | 0.15                  |                       | 55                                                                                                |                     | 3.4                                                                                                |                         |           |
| d(pT) <sub>12</sub> ×d(pA) <sub>12</sub> | 0.078                 |                       | 70                                                                                                |                     | 5.1                                                                                                |                         |           |
| d(pT) <sub>14</sub> ×d(pA) <sub>14</sub> | 0.054                 |                       | 83                                                                                                |                     | 5.6                                                                                                |                         |           |
| d(pT) <sub>21</sub> ×d(pA) <sub>21</sub> | 0.040                 |                       | 25                                                                                                |                     | 4.0                                                                                                |                         |           |

\*Standard error in experimentally determined  $K_d$  values was 10–20%; mean of 3 measurements are given.

#### References:

1. Caumont, A.; Jamieson, G.; Richard de Soultrait, V.; Parissi, V., Fournier, M.; Zakharova, O.D.; Bayandin, R.; Litvak, S.; Tarrago-Litvak, L.; Nevinsky, G.A. High affinity interaction of HIV-1 integrase with specific and non-specific single-stranded short oligonucleotides. *FEBS Lett.* **1999**, *455*, 154-158.
2. Bugreev, D.V.; Baranova, S.; Zakharova, O.D.; Parissi, V.; Desjobert, C.; Sottofattori, E.; Balbi, A.; Litvak, S.; Tarrago-Litvak, L.; Nevinsky, G.A. Dynamic, thermodynamic, and kinetic basis for recognition and transformation of DNA by human immunodeficiency virus type 1 integrase. *Biochemistry* **2003**, *42*, 9235-9247.

**Supplementary Table S14****Affinity of different unspecific single-stranded hetero-oligonucleotides for HIV-1 integrase**

| ODNs<br>(sequence)          | N° of units | $K_d$ , $\mu\text{M}$ |
|-----------------------------|-------------|-----------------------|
| CAT                         | 3           | 20                    |
| AATT                        | 4           | 140                   |
| GGAA                        | 4           | 33                    |
| (GA) <sub>3</sub>           | 6           | 1                     |
| (AC) <sub>3</sub>           | 6           | 33                    |
| CTAGCAp                     | 6           | 2.6                   |
| CpAp [Gp(Et)]T**            | 4           | 70                    |
| CpAp(Et)GpT                 | 4           | 40                    |
| [Cp(Et)]ApGpT               | 4           | 300                   |
| Cp(Et)Ap(Et)Gp(Et)T         | 4           | 600                   |
| d[Tp(Et)] <sub>9</sub> T    | 10          | 8000                  |
| d[(pT) <sub>9</sub> ]p(ddT) | 10          | 15                    |
| d(pT <sub>8</sub> )GT       | 10          | 8.3                   |
| d(GAGATCGTC)rA              | 10          | 0.5                   |
| d(pAC)(pA) <sub>8</sub>     | 10          | 18                    |
| CCAAC TTTT                  | 9           | 8.3                   |
| TCACCTCCTT                  | 10          | 6.6                   |
| CTGCGTCTATCAGCG             | 15          | 0.270                 |
| TTTTCTCTCTCCCTCT            | 17          | 0.200                 |
| GGAAAATCTCTAGCAGT           | 17          | 0.033                 |
| GTGTGGAAAATCTCTAGCAGT       | 21          | 0.010                 |
| CCCTCCTCCTTCTCTCCTT         | 21          | 0.013                 |
| CCCTCCTCCTTCTCTTTTT         | 21          | 0.100                 |

\*Standard error in experimentally determined  $K_d$  values was 10–20%; mean of 3 measurements are given.

**References:**

3. Caumont, A.; Jamieson, G.; Richard de Soultrait, V.; Parissi, V., Fournier, M.; Zakharova, O.D.; Bayandin, R.; Litvak, S.; Tarrago-Litvak, L.; Nevinsky, G.A. High affinity interaction of HIV-1 integrase with specific and non-specific single-stranded short oligonucleotides. *FEBS Lett.* **1999**, *455*, 154-158.
4. Bugreev, D.V.; Baranova, S.; Zakharova, O.D.; Parissi, V.; Desjobert, C.; Sottofattori, E.; Balbi, A.; Litvak, S.; Tarrago-Litvak, L.; Nevinsky, G.A. Dynamic, thermodynamic, and kinetic basis for recognition and transformation of DNA by human immunodeficiency virus type 1 integrase. *Biochemistry* **2003**, *42*, 9235-9247.

### Supplementary Table S15

Affinity of different specific single-stranded ODNs corresponding to the 3'-end processing GT- and complementary CA-strand of HIV DNA for HIV-1 integrase

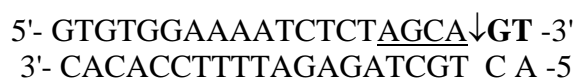

| 3'-GT-specific ODNs                       | N  | $K_d$ $\mu$ M | 3'-CA-specific ODNs        | N  |       |
|-------------------------------------------|----|---------------|----------------------------|----|-------|
| GT                                        | 2  | 130           | CA                         | 2  | 15    |
| AGT                                       | 3  | 53.3          | GCA                        | 3  | 3.5   |
| CAGT                                      | 4  | 23.3          | AGCA                       | 4  | 1     |
| GCAGT                                     | 5  | 13            | TAGCA                      | 5  | 0.7   |
| AGCAGT                                    | 6  | 6.1           | CTAGCA                     | 6  | 0.4   |
| TAGCAGT                                   | 7  | 3.3           | TCTAGCA                    | 7  | 0.3   |
| CTAGCAGT                                  | 8  | 2.5           | CTCTAGCA                   | 8  | 0.2   |
| CTCTAGCAGT                                | 10 | 0.5           | ATCTCTAGCA                 | 10 | 0.1   |
| AAATCTCTAGCAGT                            | 14 | 0.18          |                            |    |       |
| -                                         | -  | -             | GGAAAATCTCTAGCA            | 15 | 0.075 |
| GAAAATCTCTAGCAGT                          | 16 | 0.063         |                            |    |       |
| GTGTGGAAAATCTCTAGCAG••                    | 19 | 0.03          | GTGTGGAAAATCTCTAGCA        | 19 | 0.03  |
| GTGTGGAAAATCTCTAGCAG•                     | 20 | 0.15          | -                          | -  | -     |
| GTGTGGAAAATCTCTAGCAGT                     | 21 | 0.01          | -                          | -  | -     |
| T <sub>19</sub> GT                        | 21 | 0.4           | -                          | -  | -     |
| TTTTGTAAAACCCACGGCCAGT                    | 21 | 0.17          | -                          | -  | -     |
| GTGTGGAAAATCTCTAGCAGrU                    | 21 | 0.083         | -                          | -  | -     |
| Specific double stranded ODNs             |    | $K_d$ $\mu$ M | Ratio : $K_d$ ss/ $K_d$ ds | -  | -     |
| AGT•d(N) <sub>3</sub>                     | 3  | 40            | 1.33                       | -  | -     |
| CAGT•d(N) <sub>4</sub>                    | 4  | 10            | 2.33                       | -  | -     |
| AGCAGT•d(N) <sub>6</sub>                  | 6  | 0.18          | 33.9                       | -  | -     |
| CTAGCAGT•d(N) <sub>8</sub>                | 8  | 0.032         | 78                         | -  | -     |
| CT CTAGCAGT•d(N) <sub>10</sub>            | 10 | 0.010         | 50                         | -  | -     |
| AAATCTCTAGCAGT•d(N) <sub>14</sub>         | 14 | 0.0032        | 56.3                       | -  | -     |
| GAAAATCTCTAGCAGT•d(N) <sub>16</sub>       | 16 | 0.0020        | 31.5                       | -  | -     |
| GTGTGGAAAATCTCTAGCA• d(N) <sub>19</sub>   | 19 | 0.0040        | 7.5                        | -  | -     |
| GTGTGGAAAATCTCTAGCAG• d(N) <sub>20</sub>  | 20 | 0.06          | 2.5                        | -  | -     |
| GTGTGGAAAATCTCTAGCAGT•d(N) <sub>21</sub>  | 21 | 0.0013        | 7.7                        | -  | -     |
| T <sub>19</sub> GT•A <sub>19</sub> CA     | 21 | 0.036         | 11.1                       | -  | -     |
| GTGTGGAAAATCTCTAGCAGrU•d(N) <sub>21</sub> | 21 | 0.05          | 1.66                       | -  | -     |

\* Standard error in experimentally determined  $K_d$  values was 10–20%; mean of 3 measurements are given.

#### References:

1. Caumont, A.; Jamieson, G.; Richard de Soultrait, V.; Parissi, V., Fournier, M.; Zakharova, O.D.; Bayandin, R.; Litvak, S.; Tarrago-Litvak, L.; Nevinsky, G.A. High affinity interaction of HIV-1 integrase with specific and non-specific single-stranded short oligonucleotides. *FEBS Lett.* **1999**, *455*, 154-158.
2. Bugreev, D.V.; Baranova, S.; Zakharova, O.D.; Parissi, V.; Desjobert, C.; Sottofattori, E.; Balbi, A.; Litvak, S.; Tarrago-Litvak, L.; Nevinsky, G.A. Dynamic, thermodynamic, and kinetic basis for recognition and transformation of DNA by human immunodeficiency virus type 1 integrase. *Biochemistry* **2003**, *42*, 9235-9247.

**Supplementary Table S16****Affinity of different ligands and unspecific single-stranded ODNs for human topoisomerase I**

| Ligand              | $K_d$ , M            | Ligand              | $K_d$ , M            | Ligand              | $K_d$ , M            |
|---------------------|----------------------|---------------------|----------------------|---------------------|----------------------|
| $P_i$               | 0.38                 | d(pT) <sub>2</sub>  | $3.4 \times 10^{-5}$ | d(pA) <sub>2</sub>  | $5.2 \times 10^{-5}$ |
|                     |                      | d(pT) <sub>3</sub>  | $3.7 \times 10^{-3}$ | d(pA) <sub>3</sub>  | $2.1 \times 10^{-5}$ |
| d(pC) <sub>2</sub>  | $8.2 \times 10^{-4}$ | d(pT) <sub>4</sub>  | $7.9 \times 10^{-3}$ | d(pA) <sub>4</sub>  | $1.2 \times 10^{-3}$ |
| d(pC) <sub>4</sub>  | $3.8 \times 10^{-5}$ | d(pT) <sub>5</sub>  | $2.6 \times 10^{-3}$ | d(pA) <sub>6</sub>  | $6.1 \times 10^{-5}$ |
| d(pC) <sub>6</sub>  | $6.7 \times 10^{-5}$ | d(pT) <sub>6</sub>  | $1.2 \times 10^{-3}$ | d(pA) <sub>8</sub>  | $3.3 \times 10^{-4}$ |
| d(pC) <sub>8</sub>  | $2.3 \times 10^{-4}$ | d(pT) <sub>8</sub>  | $1.7 \times 10^{-3}$ | d(pA) <sub>10</sub> | $2.3 \times 10^{-3}$ |
| d(pC) <sub>10</sub> | $7.3 \times 10^{-4}$ | d(pT) <sub>10</sub> | $5.0 \times 10^{-4}$ | d(pA) <sub>12</sub> | $7.5 \times 10^{-4}$ |
| d(pC) <sub>12</sub> | $5.8 \times 10^{-5}$ | d(pT) <sub>12</sub> | $1.3 \times 10^{-4}$ | d(pA) <sub>14</sub> | $1.1 \times 10^{-4}$ |
| d(pC) <sub>14</sub> | $1.0 \times 10^{-5}$ | d(pT) <sub>14</sub> | $4.0 \times 10^{-5}$ | d(pA) <sub>16</sub> | $8.3 \times 10^{-6}$ |
| d(pC) <sub>16</sub> | $2.1 \times 10^{-6}$ | d(pT) <sub>16</sub> | $1.1 \times 10^{-5}$ |                     |                      |

\*Standard error in experimentally determined  $K_d$  values was 10–15%; mean of 3 measurements are given.

**References:**

1. Bugreev, D.V.; Buneva, V.N.; Sinitsina, O.I.; Nevinsky, G.A. Mechanism of recognition of supercoiled DNA by eukaryotic DNA topoisomerases I: Interactions of enzymes with nonspecific oligonucleotides". *Bioorg. Khim. (Moscow)* **2003**, *29*, 163–174.
2. Bugreev, D.V.; Buneva, V.N.; Sinitsina, O.I.; Nevinskii, G.A. The mechanism of supercoiled DNA recognition by eukaryotic type I topoisomerases. II. A comparison of the enzyme interaction with specific and nonspecific oligonucleotides", *Bioorg. Khim. (Moscow)* **2003**, *29*, 277-289.
3. Bugreev, D.V.; Buneva, V.N.; Nevinsky, G.A. Mechanism of supercoiled DNA cleavage by human DNA topoisomerase I: Effect of ligand structure on the catalytic stage of the reaction", *Mol. Biol. (Moscow)* **2003**, *37*, 325–339.



**Supplementary Table S17****Affinity of different single-stranded ODNs corresponding to different parts of a specific DNA sequence (AAGACTTAGT) for human topoisomerase**

| Ligand | $K_d$ , M            | Ligand         | $K_d$ , M            | Ligand         | $K_d$ , M            |
|--------|----------------------|----------------|----------------------|----------------|----------------------|
| pAA    | $5.2 \times 10^{-5}$ | AAGACTTAG<br>T | $1.6 \times 10^{-6}$ | AAGACTTAG<br>T | $1.6 \times 10^{-6}$ |
| pTT    | $3.4 \times 10^{-5}$ | TAG            | $4.0 \times 10^{-4}$ | ACTT           | $1.0 \times 10^{-4}$ |
| pTA    | $2.6 \times 10^{-3}$ | CTT            | $1.0 \times 10^{-3}$ | pACTT          | $2.0 \times 10^{-6}$ |
| pAT    | $2.4 \times 10^{-5}$ | pCTT           | $1.5 \times 10^{-4}$ | GACT           | $2.0 \times 10^{-4}$ |
| pCT    | $9.4 \times 10^{-5}$ | ACT            | $8.0 \times 10^{-4}$ | pGACT          | $2.1 \times 10^{-4}$ |
| pTC    | $2.1 \times 10^{-3}$ | GAC            | $1.0 \times 10^{-4}$ | AGAC           | $3.0 \times 10^{-5}$ |
| pCC    | $8.2 \times 10^{-4}$ | AGA            | $1.5 \times 10^{-5}$ | pAGAC          | $3.2 \times 10^{-5}$ |
| pGG    | $1.0 \times 10^{-4}$ | AAG            | $1.5 \times 10^{-4}$ | AAGA           | $1.0 \times 10^{-5}$ |
| pGA    | $9.0 \times 10^{-5}$ | -              | -                    | -              | -                    |
| pAG    | $6.0 \times 10^{-5}$ | -              | -                    | -              | -                    |
| TpT    | $3.0 \times 10^{-4}$ | -              | -                    | -              | -                    |
| TpTp   | $5.6 \times 10^{-5}$ | -              | -                    | -              | -                    |
| ApA    | $6.4 \times 10^{-4}$ | -              | -                    | -              | -                    |

\*Standard error in experimentally determined  $K_d$  values was 10–15%; mean of 2-3 measurements are given.

**References:**

1. Bugreev, D.V.; Buneva, V.N.; Sinitsina, O.I.; Nevinsky, G.A. Mechanism of recognition of supercoiled DNA by eukaryotic DNA topoisomerases I: Interactions of enzymes with nonspecific oligonucleotides". *Bioorg. Khim. (Moscow)* **2003**, *29*, 163–174.
2. Bugreev, D.V.; Buneva, V.N.; Sinitsina, O.I.; Nevinskii, G.A. The mechanism of supercoiled DNA recognition by eukaryotic type I topoisomerases. II. A comparison of the enzyme interaction with specific and nonspecific oligonucleotides", *Bioorg. Khim. (Moscow)* **2003**, *29*, 277-289.
3. Bugreev, D.V.; Buneva, V.N.; Nevinsky, G.A. Mechanism of supercoiled DNA cleavage by human DNA topoisomerase I: Effect of ligand structure on the catalytic stage of the reaction", *Mol. Biol. (Moscow)* **2003**, *37*, 325–339.

**Supplementary Table S18**

**Affinity of different single- and double-stranded ODNs corresponding to different parts of a specific DNA sequence for human topoisomerase before and after reaction mixture preincubation**

| <b>Ligand</b>          | <b><math>K_d</math> (1), <math>\mu</math>M (before preincubation)</b> | <b><math>K_d</math> (2), <math>\mu</math>M (after preincubation)</b> | <b>Ratio: <math>K_d</math> (1)/<math>K_d</math> (2)</b> |
|------------------------|-----------------------------------------------------------------------|----------------------------------------------------------------------|---------------------------------------------------------|
| <b>AAGTC (NC5)</b>     | <b>92.0</b>                                                           | <b>8.3</b>                                                           | <b>11.0</b>                                             |
| <b>GACTT (C5)</b>      | <b>2.0</b>                                                            | <b>0.40</b>                                                          | <b>5.0</b>                                              |
| <b>CTAAGTCTT (NC9)</b> | <b>2.1</b>                                                            | <b>0.17</b>                                                          | <b>12.3</b>                                             |
| <b>AAGACTTAG (C9)</b>  | <b>1.6</b>                                                            | <b>0.32</b>                                                          | <b>5.0</b>                                              |
| <b>NC27**</b>          | <b>166.0</b>                                                          | <b>8.3</b>                                                           | <b>20.0</b>                                             |
| <b>C27**</b>           | <b>83.0</b>                                                           | <b>4.2</b>                                                           | <b>19.8</b>                                             |
| <b>C5+NC5</b>          | <b>7.5</b>                                                            | <b>1.0</b>                                                           | <b>7.5</b>                                              |
| <b>C9+NC5</b>          | <b>0.65</b>                                                           | <b>0.16</b>                                                          | <b>4.0</b>                                              |
| <b>C9+C5</b>           | <b>25.0</b>                                                           | <b>0.6</b>                                                           | <b>42.0</b>                                             |
| <b>C5+NC9</b>          | <b>29.0</b>                                                           | <b>2.0</b>                                                           | <b>14.5</b>                                             |
| <b>C9+NC9</b>          | <b>0.65</b>                                                           | <b>0.085</b>                                                         | <b>7.6</b>                                              |
| <b>NC27+C27</b>        | <b>0.07</b>                                                           | <b>0.01</b>                                                          | <b>7.0</b>                                              |
| <b>AAGAAATAG</b>       | <b>2.2</b>                                                            | <b>-</b>                                                             | <b>-</b>                                                |
| <b>AAGACTTAGp</b>      | <b>1.6</b>                                                            | <b>-</b>                                                             | <b>-</b>                                                |
| <b>AAGACTT</b>         | <b>20.0</b>                                                           | <b>-</b>                                                             | <b>-</b>                                                |
| <b>AAGACTTp</b>        | <b>1.1</b>                                                            | <b>-</b>                                                             | <b>-</b>                                                |

\*Standard error in experimentally determined  $K_d$  values was 10–20%; mean of 3 measurements are given.

\*\*C27. AAAAAGACTTAGAAAAATTTTTAAAG;  
NC27.CTTTAAAAATTTTTCTAAGTCTTTTTT.

**References:**

1. Bugreev, D.V.; Buneva, V.N.; Sinitsina, O.I.; Nevinsky, G.A. Mechanism of recognition of supercoiled DNA by eukaryotic DNA topoisomerases I: Interactions of enzymes with nonspecific oligonucleotides". *Bioorg. Khim. (Moscow)* **2003**, *29*, 163–174.
2. Bugreev, D.V.; Buneva, V.N.; Sinitsina, O.I.; Nevinskii, G.A. The mechanism of supercoiled DNA recognition by eukaryotic type I topoisomerases. II. A comparison of the enzyme interaction with specific and nonspecific oligonucleotides", *Bioorg. Khim. (Moscow)* **2003**, *29*, 277-289.
3. Bugreev, D.V.; Buneva, V.N.; Nevinsky, G.A. Mechanism of supercoiled DNA cleavage by human DNA topoisomerase I: Effect of ligand structure on the catalytic stage of the reaction", *Mol. Biol. (Moscow)* **2003**, *37*, 325–339.

**Supplementary Table S19**

A rough estimate of the relative contribution of various factors (in terms of affinity,  $K_d$  values). characterizing the specific and unspecific interactions of mouse and human topoisomerases with DNA.

| Topo  | Ligands and conditions                      |    | $K_d$ , M             | Increasing affinity factor |
|-------|---------------------------------------------|----|-----------------------|----------------------------|
| Mouse | Unspecific                                  | ss | $8.5 \times 10^{-5}$  |                            |
|       |                                             | ds | $1.0 \times 10^{-5}$  | 8.5                        |
|       | Specific                                    | ss | $2.0 \times 10^{-6}$  | 50                         |
|       |                                             | ds | $7.0 \times 10^{-8}$  | 29                         |
|       | Strengthening contacts after pre-incubation | ds | $1.0 \times 10^{-8}$  | 7                          |
|       | "Topimage" os supercoiled DNA               | ds | $10^{-10}$            | 100                        |
| Human | Unspecific                                  | ss | $5.0 \times 10^{-4}$  |                            |
|       |                                             | ds | $>1.0 \times 10^{-3}$ | <0.5                       |
|       | Specific                                    | ss | $1.6 \times 10^{-6}$  | 312                        |
|       |                                             | ds | $7.0 \times 10^{-8}$  | 23                         |
|       | Strengthening contacts after pre-incubation | ds | $1.0 \times 10^{-8}$  | 7                          |
|       | "Topimage" os supercoiled DNA               | ds | $10^{-10}$            | 100                        |

\*Standard error in experimentally determined  $K_d$  values was 10–30%; mean of 3 measurements are given.

**References:**

1. Bugreev, D.V.; Buneva, V.N.; Nevinsky, G.A. Mechanism of supercoiled DNA cleavage by human DNA topoisomerase I: Effect of ligand structure on the catalytic stage of the reaction”, *Mol. Biol. (Moscow)* **2003**. 37, 325–339.

## Supplementary Table S20

Affinity of the first LF DNA-binding site for minimal ligands and their structural components

| Ligand        | $K_d$ , mM* | $\Delta G^\circ$ , kcal/mol*** |
|---------------|-------------|--------------------------------|
| Pi            | 5.0±0.5     | 3.2±0.3                        |
| dRp           | 3.0±0.2     | 3.5±0.2                        |
| Deoxyribose** | 600.0±60.0  | 0.3±0.03                       |
| dGMP          | 1.0±0.1     | 4.2±0.4                        |
| G-base**      | 333.3±30.0  | 7.0±0.07                       |
| dAMP          | 1.1±0.07    | 4.1±0.3                        |
| A-base**      | 366.7±30.0  | 0.6±0.05                       |
| TMP           | 1.6±0.1     | 3.9±0.24                       |
| T-base**      | 533.5±50.0  | 0.4±0.04                       |
| dCMP          | 0.56±0.06   | 4.5±0.5                        |
| C-base**      | 190.0±20.0  | 1.0±0.1                        |

\*Mean±S.E. of three measurements are given

\*\*Orthophosphate (P<sub>i</sub>) and deoxyribosephosphate (dRp) or (dRp) and different dNMPs

\*\*\* $\Delta G^\circ = -RT \times \ln K_d$

### References:

1. Guschina, T.A.; Soboleva, S.E.; Nevinsky, G.A. Recognition of specific and nonspecific DNA by human lactoferrin. *J. Mol. Recognit.* **2013**, **26**, 136-148.

**Supplementary Table S21**

**Affinity of the first LF DNA-binding site for single- and double-stranded homo-ODNs and mixed-sequence ODNs**

| Ligand*                                  | $K_d, M^{**}$         | Ligand                                   | $K_d, M$             | Ligand                   | $K_d, M$             |
|------------------------------------------|-----------------------|------------------------------------------|----------------------|--------------------------|----------------------|
| d(pA) <sub>2</sub>                       | $3.7 \times 10^{-4}$  | d(pT) <sub>2</sub>                       | $5.0 \times 10^{-4}$ | d(pC) <sub>2</sub>       | $2.7 \times 10^{-4}$ |
| d(pA) <sub>4</sub>                       | $1.0 \times 10^{-4}$  | d(pT) <sub>4</sub>                       | $1.7 \times 10^{-4}$ | d(pC) <sub>4</sub>       | $6.5 \times 10^{-5}$ |
| d(pA) <sub>6</sub>                       | $2.0 \times 10^{-5}$  | d(pT) <sub>6</sub>                       | $3.3 \times 10^{-5}$ | d(pC) <sub>6</sub>       | $1.1 \times 10^{-5}$ |
| d(pA) <sub>8</sub>                       | $5.0 \times 10^{-6}$  | d(pT) <sub>8</sub>                       | $7.3 \times 10^{-6}$ | d(pC) <sub>8</sub>       | $3.0 \times 10^{-6}$ |
| d(pA) <sub>9</sub>                       | $3.3 \times 10^{-6}$  | –                                        | –                    | d(pC) <sub>9</sub>       | $1.0 \times 10^{-6}$ |
| d(pA) <sub>10</sub>                      | $6.6 \times 10^{-7*}$ | d(pT) <sub>10</sub>                      | $8.3 \times 10^{-7}$ | d(pC) <sub>10</sub>      | $4.2 \times 10^{-7}$ |
| d(pA) <sub>12</sub>                      | $6.3 \times 10^{-7}$  | d(pT) <sub>12</sub>                      | $5.8 \times 10^{-7}$ | d(pC) <sub>12</sub>      | $3.2 \times 10^{-7}$ |
| d(pA) <sub>13</sub>                      | $1.3 \times 10^{-6}$  | d(pT) <sub>13</sub>                      | $1.0 \times 10^{-6}$ | d(pC) <sub>12</sub>      | $3.0 \times 10^{-7}$ |
| d(pA) <sub>14</sub>                      | $7.9 \times 10^{-7}$  | d(pT) <sub>14</sub>                      | $8.3 \times 10^{-7}$ | d(pC) <sub>14</sub>      | $2.8 \times 10^{-7}$ |
| d(pA) <sub>16</sub>                      | $8.1 \times 10^{-7}$  | d(pT) <sub>16</sub>                      | $5.7 \times 10^{-7}$ | d(pC) <sub>16</sub>      | $2.8 \times 10^{-7}$ |
| d(pA) <sub>20</sub>                      | $8.0 \times 10^{-7}$  | d(pT) <sub>20</sub>                      | $6.0 \times 10^{-7}$ | d(pC) <sub>20</sub>      | $2.7 \times 10^{-7}$ |
| d[p(Et)T] <sub>10</sub> *                | $9.0 \times 10^{-6}$  | d(pT(pR) <sub>5</sub> )*                 | $3.9 \times 10^{-5}$ | d(pT(pR) <sub>9</sub> )* | $1.8 \times 10^{-6}$ |
| ODN1                                     | $8.0 \times 10^{-8}$  | ODN2                                     | $2.2 \times 10^{-7}$ | ODN3                     | $8.0 \times 10^{-7}$ |
| ODN4                                     | $3.5 \times 10^{-7}$  | ODN5                                     | $6.4 \times 10^{-7}$ | ODN6                     | $6.6 \times 10^{-7}$ |
| ODN7                                     | $6.8 \times 10^{-7}$  | ODN8                                     | $4.5 \times 10^{-7}$ | -                        | -                    |
| r(pA) <sub>10</sub>                      | $2.3 \times 10^{-7}$  | r(pU) <sub>10</sub>                      | $1.1 \times 10^{-7}$ | r(pC) <sub>10</sub>      | $1.5 \times 10^{-7}$ |
| Ligand                                   | $K_i, M$              | Ligand                                   | $K_i, M$             |                          |                      |
| d(pA) <sub>4</sub> ×d(pT) <sub>4</sub>   | $3.2 \times 10^{-5}$  | d(pA) <sub>12</sub> ×d(pT) <sub>12</sub> | $9.0 \times 10^{-8}$ |                          |                      |
| d(pA) <sub>6</sub> ×d(pT) <sub>6</sub>   | $8.7 \times 10^{-6}$  | d(pA) <sub>14</sub> ×d(pT) <sub>14</sub> | $3.3 \times 10^{-8}$ |                          |                      |
| d(pA) <sub>8</sub> ×d(pT) <sub>8</sub>   | $2.0 \times 10^{-6}$  | d(pA) <sub>16</sub> ×d(pT) <sub>16</sub> | $3.3 \times 10^{-8}$ |                          |                      |
| d(pA) <sub>10</sub> ×d(pT) <sub>10</sub> | $2.7 \times 10^{-7}$  | d(pA) <sub>20</sub> ×d(pT) <sub>20</sub> | $3.0 \times 10^{-8}$ |                          |                      |
| ds ODN1**                                | $1.0 \times 10^{-8}$  | ds ODN2                                  | $1.8 \times 10^{-7}$ |                          |                      |
| ds ODN3                                  | $2.5 \times 10^{-7}$  | ds ODN4                                  | $1.5 \times 10^{-7}$ |                          |                      |
| ODN5                                     | $3.0 \times 10^{-7}$  | ODN6                                     | $2.8 \times 10^{-7}$ |                          |                      |
| ODN7                                     | $2.4 \times 10^{-7}$  | ODN8                                     | $2.0 \times 10^{-7}$ |                          |                      |

\* Mean of three independent experiments; the error did not exceed 10-15%.

\*R is a tetrahydrofuran analog of abasic deoxyribose; Et, ethyl.

\*\*ODN1, d(pTpApGpApApGpApTpCpApApA); ODN2, d(pApCpTpApCpApGpTpCpTpApCpA);

ODN3, d(pCpTpTpTpTpCpCpGpCpCpTpCp); ODN4, d(pCpTpTpTpTpCpCpGpCpCp);

ODN5, d(pApTpApTpTpApApApG); ODN6, d(pTpGpTpApApGpGpTpTpT);

ODN7, d(pGpGpTpTpTpApApTpTpA); ODN8, (pGpTpApTpGpTpTpApApApTpApApApTpGpT).

**References:**

1. Guschina, T.A.; Soboleva, S.E.; Nevinsky, G.A. Recognition of specific and nonspecific DNA by human lactoferrin. *J. Mol. Recognit.* **2013**, *26*, 136-148.

**Supplementary Table S22**

Affinity of the first and second HSA DNA-binding site for *orthophosphate*, dNMPs, single- and double-stranded ODNs

| Ligand                                   | <i>n</i> | Kd(1), M*                              | Kd(2), M                               |
|------------------------------------------|----------|----------------------------------------|----------------------------------------|
| <b>Orthophosphate</b>                    | <b>0</b> | <b><math>3.0 \times 10^{-3}</math></b> | <b><math>2.0 \times 10^{-2}</math></b> |
| d(pA)                                    | 1        | $5.6 \times 10^{-6}$                   | $6.3 \times 10^{-5}$                   |
| d(pA) <sub>2</sub>                       | 2        | $8.5 \times 10^{-7}$                   | $6.5 \times 10^{-6}$                   |
| d(pA) <sub>3</sub>                       | 3        | $2.5 \times 10^{-7}$                   | $2.5 \times 10^{-6}$                   |
| d(pA) <sub>4</sub>                       | 4        | $9.7 \times 10^{-8}$                   | $9.5 \times 10^{-7}$                   |
| d(pA) <sub>5</sub>                       | 5        | $9.0 \times 10^{-8}$                   | $4.9 \times 10^{-7}$                   |
| d(pA) <sub>6</sub>                       | 6        | $7.0 \times 10^{-8}$                   | $7.4 \times 10^{-7}$                   |
| d(pA) <sub>7</sub>                       | 7        | $5.0 \times 10^{-8}$                   | $6.0 \times 10^{-7}$                   |
| d(pA) <sub>10</sub>                      | 10       | $7.2 \times 10^{-8}$                   | $4.5 \times 10^{-7}$                   |
| d(pA) <sub>11</sub>                      | 11       | $2.8 \times 10^{-8}$                   | $4.0 \times 10^{-7}$                   |
| d(pA) <sub>13</sub>                      | 13       | $2.8 \times 10^{-8}$                   | $3.3 \times 10^{-7}$                   |
| d(pA) <sub>24</sub>                      | 24       | $2.4 \times 10^{-8}$                   | $2.4 \times 10^{-7}$                   |
| d(pT)                                    | 1        | $1.7 \times 10^{-5}$                   | $1.0 \times 10^{-3}$                   |
| d(pT) <sub>2</sub>                       | 2        | $1.0 \times 10^{-6}$                   | $3.0 \times 10^{-5}$                   |
| d(pT) <sub>3</sub>                       | 3        | $1.8 \times 10^{-8}$                   | $1.0 \times 10^{-6}$                   |
| d(pT) <sub>4</sub>                       | 4        | $7.2 \times 10^{-9}$                   | $4.8 \times 10^{-7}$                   |
| d(pT) <sub>5</sub>                       | 5        | $2.0 \times 10^{-9}$                   | $2.4 \times 10^{-7}$                   |
| d(pT) <sub>6</sub>                       | 6        | $1.7 \times 10^{-9}$                   | $1.8 \times 10^{-7}$                   |
| d(pT) <sub>11</sub>                      | 11       | $1.8 \times 10^{-9}$                   | $1.8 \times 10^{-7}$                   |
| d(pT) <sub>12</sub>                      | 12       | $1.7 \times 10^{-9}$                   | $1.5 \times 10^{-7}$                   |
| d(pT) <sub>16</sub>                      | 16       | $1.4 \times 10^{-9}$                   | $1.0 \times 10^{-7}$                   |
| d(pT) <sub>24</sub>                      | 24       | $1.4 \times 10^{-9}$                   | $8.0 \times 10^{-8}$                   |
| d(pT) <sub>30</sub>                      | 30       | $1.6 \times 10^{-9}$                   | $8.0 \times 10^{-8}$                   |
| d(pC)                                    | 1        | $4.0 \times 10^{-4}$                   | $1.8 \times 10^{-2}$                   |
| d(pC) <sub>2</sub>                       | 2        | $9.5 \times 10^{-5}$                   | $3.0 \times 10^{-3}$                   |
| d(pC) <sub>3</sub>                       | 3        | $9.5 \times 10^{-6}$                   | $3.0 \times 10^{-5}$                   |
| d(pC) <sub>4</sub>                       | 4        | $6.3 \times 10^{-7}$                   | $2.0 \times 10^{-6}$                   |
| d(pC) <sub>5</sub>                       | 5        | $2.5 \times 10^{-7}$                   | $1.0 \times 10^{-6}$                   |
| d(pC) <sub>6</sub>                       | 6        | $2.4 \times 10^{-7}$                   | $8.0 \times 10^{-7}$                   |
| d(pC) <sub>8</sub>                       | 8        | $1.8 \times 10^{-7}$                   | $4.0 \times 10^{-7}$                   |
| d(pC) <sub>9</sub>                       | 9        | $1.5 \times 10^{-7}$                   | $2.4 \times 10^{-7}$                   |
| d(pC) <sub>10</sub>                      | 10       | $1.5 \times 10^{-7}$                   | $2.4 \times 10^{-7}$                   |
| d(pC) <sub>12</sub>                      | 12       | $1.5 \times 10^{-7}$                   | $1.8 \times 10^{-7}$                   |
| d(pC) <sub>30</sub>                      | 30       | $1.5 \times 10^{-7}$                   | $1.8 \times 10^{-7}$                   |
| d(pA) <sub>2</sub> ×d(pT) <sub>2</sub>   | 2        | $8.1 \times 10^{-7}$                   | $1.0 \times 10^{-5}$                   |
| d(pA) <sub>4</sub> ×d(pT) <sub>4</sub>   | 4        | $1.4 \times 10^{-7}$                   | $2.4 \times 10^{-6}$                   |
| d(pA) <sub>8</sub> ×d(pT) <sub>8</sub>   | 8        | $3.0 \times 10^{-7}$                   | $3.0 \times 10^{-6}$                   |
| d(pA) <sub>12</sub> ×d(pT) <sub>12</sub> | 12       | $4.0 \times 10^{-7}$                   | $4.0 \times 10^{-6}$                   |
| d(pA) <sub>16</sub> ×d(pT) <sub>16</sub> | 16       | $5.0 \times 10^{-7}$                   | $4.5 \times 10^{-6}$                   |
| d(pA) <sub>20</sub> ×d(pT) <sub>20</sub> | 20       | $5.0 \times 10^{-7}$                   | $4.5 \times 10^{-6}$                   |

Mean of three independent experiments; the error did not exceed 10-15%.

**References:**

1. Alinovskaya, L.I.; Sedykh, S.E.; Ivanisenko, N.V.; Soboleva, S.E.; Nevinsky, G.A. How human serum albumin recognizes DNA and RNA. *Biol. Chem.* **2018**, *399*, 347-360.

**Supplementary Table S23**

**Thermodynamic parameters ( $\Delta G^\circ$ , kcal/mol) characterizing interaction of every of eight mononucleotide units of different oligonucleotides with the first and the second DNA-binding sites of human serum albumin**

| Oligo-nucleotide   | Gibbs free energy, kcal/mol*                                                      |      |      |      |       |       |      |       |       |
|--------------------|-----------------------------------------------------------------------------------|------|------|------|-------|-------|------|-------|-------|
|                    | Number ( <i>n</i> ) of monomers in d(pN) <sub>n</sub> and sum of $\Delta G^\circ$ |      |      |      |       |       |      |       |       |
|                    | The first DNA-binding site                                                        |      |      |      |       |       |      |       |       |
|                    | 1                                                                                 | 2    | 3    | 4    | 5     | 6     | 7    | 8     | Sum   |
| d(pA) <sub>n</sub> | 7.16                                                                              | 1.12 | 0.7  | 0.64 | 0.19  | 0.07  | ~0.0 | ~0.0  | 9.88  |
| d(pT) <sub>n</sub> | 6.1                                                                               | 1.68 | 2.38 | 0.54 | 0.48  | 0.10  | ~0.0 | ~0.0  | 11.28 |
| d(pC) <sub>n</sub> | 4.63                                                                              | 0.85 | 1.36 | 1.6  | 0.55  | 0.013 | ~0.0 | ~0.0  | 9.00  |
| r(pA) <sub>n</sub> | 6.16                                                                              | 2.78 | 0.87 | 0.11 | 0.055 | 0.025 | ~0.0 | ~0.0  | 10.0  |
| r(pU) <sub>n</sub> | 7.0                                                                               | 0.95 | 0.81 | 0.32 | 0.47  | 0.27  | 0.13 | ~0.0  | 9.95  |
| r(pC) <sub>n</sub> | 7.24                                                                              | 0.94 | 1.05 | 0.50 | 0.83  | 0.35  | 0.25 | 0.25  | 11.41 |
|                    | The second DNA-binding site                                                       |      |      |      |       |       |      |       |       |
| d(pA) <sub>n</sub> | 5.73                                                                              | 1.34 | 0.57 | 0.39 | 0.19  | 0.15  | 0.12 | ~0.0  | 8.49  |
| d(pT) <sub>n</sub> | 4.1                                                                               | 2.1  | 2.0  | 0.43 | 0.41  | 0.17  | 0.15 | ~0.0  | 9.36  |
| d(pC) <sub>n</sub> | 1.75                                                                              | 1.10 | 2.73 | 1.6  | 0.41  | 0.13  | 0.17 | ~0.0  | 7.89  |
| r(pA) <sub>n</sub> | 4.91                                                                              | 1.63 | 0.97 | 0.56 | 0.54  | 0.22  | 0.11 | 0.013 | 8.95  |
| r(pU) <sub>n</sub> | 5.71                                                                              | 0.23 | 0.62 | 0.94 | 0.20  | 0.51  | 0.24 | ~0.0  | 8.45  |
| r(pC) <sub>n</sub> | 6.62                                                                              | 0.74 | 0.26 | 0.57 | 0.54  | 0.17  | 0.20 | 0.24  | 9.34  |

\*Mean of three independent experiments; the error did not exceed 10-15%.

1. Alinovskaya, L.I.; Sedykh, S.E.; Ivanisenko, N.V.; Soboleva, S.E.; Nevinsky, G.A. How human serum albumin recognizes DNA and RNA. *Biol. Chem.* **2018**, *399*, 347-360.

**Supplementary Table S24**

**The affinity of  $\alpha$ -lactalbumin for *orthophosphate*, dNMP, single- and double-stranded ODNs**

| <b>Ligand</b>                            | <b><i>n</i></b> | <b><math>K_d</math>, M*</b> | <b>Ligand</b>                            | <b><i>n</i></b> | <b><math>K_d</math>, M*</b> |
|------------------------------------------|-----------------|-----------------------------|------------------------------------------|-----------------|-----------------------------|
| <i>Orthophosphate</i>                    | 0               | $1.0 \times 10^{-3}$        | -                                        | -               | -                           |
| d(pA)                                    | 1               | $5.0 \times 10^{-5}$        | d(pT)                                    | 1               | $3.0 \times 10^{-4}$        |
| d(pA) <sub>2</sub>                       | 2               | $5.3 \times 10^{-6}$        | d(pT) <sub>2</sub>                       | 2               | $6.5 \times 10^{-5}$        |
| d(pA) <sub>3</sub>                       | 3               | $2.8 \times 10^{-6}$        | d(pT) <sub>3</sub>                       | 3               | $9.4 \times 10^{-6}$        |
| d(pA) <sub>4</sub>                       | 4               | $6.6 \times 10^{-7}$        | d(pT) <sub>4</sub>                       | 4               | $1.8 \times 10^{-6}$        |
| d(pA) <sub>5</sub>                       | 5               | $2.4 \times 10^{-7}$        | d(pT) <sub>5</sub>                       | 5               | $1.4 \times 10^{-6}$        |
| d(pA) <sub>6</sub>                       | 6               | $8.8 \times 10^{-8}$        | d(pT) <sub>6</sub>                       | 6               | $9.0 \times 10^{-7}$        |
| d(pA) <sub>7</sub>                       | 7               | $8.8 \times 10^{-8}$        | d(pT) <sub>8</sub>                       | 8               | $1.0 \times 10^{-6}$        |
| d(pA) <sub>8</sub>                       | 8               | $1.0 \times 10^{-7}$        | d(pT) <sub>10</sub>                      | 10              | $2.4 \times 10^{-6}$        |
| d(pA) <sub>11</sub>                      | 11              | $1.3 \times 10^{-7}$        | d(pT) <sub>11</sub>                      | 11              | $1.1 \times 10^{-5}$        |
| d(pA) <sub>13</sub>                      | 13              | $1.6 \times 10^{-7}$        | d(pT) <sub>12</sub>                      | 12              | $1.5 \times 10^{-5}$        |
| d(pA) <sub>16</sub>                      | 16              | $1.2 \times 10^{-6}$        | d(pT) <sub>14</sub>                      | 14              | $1.9 \times 10^{-5}$        |
| d(pA) <sub>20</sub>                      | 20              | $2.2 \times 10^{-6}$        | d(pT) <sub>16</sub>                      | 16              | $8.6 \times 10^{-5}$        |
| d(pA) <sub>24</sub>                      | 24              | $2.9 \times 10^{-6}$        | d(pT) <sub>24</sub>                      | 24              | $1.1 \times 10^{-4}$        |
| d(pC)                                    | 1               | $1.2 \times 10^{-4}$        | d(pC) <sub>8</sub>                       | 8               | $5.0 \times 10^{-7}$        |
| d(pC) <sub>2</sub>                       | 2               | $3.0 \times 10^{-5}$        | d(pC) <sub>9</sub>                       | 9               | $5.3 \times 10^{-7}$        |
| d(pC) <sub>3</sub>                       | 3               | $1.2 \times 10^{-6}$        | d(pC) <sub>10</sub>                      | 10              | $2.6 \times 10^{-6}$        |
| d(pC) <sub>4</sub>                       | 4               | $5.5 \times 10^{-7}$        | d(pC) <sub>12</sub>                      | 12              | $1.2 \times 10^{-5}$        |
| d(pC) <sub>5</sub>                       | 5               | $2.2 \times 10^{-7}$        | d(pC) <sub>16</sub>                      | 16              | $1.6 \times 10^{-4}$        |
| d(pC) <sub>6</sub>                       | 6               | $2.1 \times 10^{-7}$        | d(pC) <sub>24</sub>                      | 24              | $1.8 \times 10^{-4}$        |
| d(pA) <sub>6</sub> ×d(pT) <sub>6</sub>   | 6               | $1.8 \times 10^{-7}$        | d(pA) <sub>16</sub> ×d(pT) <sub>16</sub> | 16              | $8.5 \times 10^{-6}$        |
| d(pA) <sub>12</sub> ×d(pT) <sub>12</sub> | 12              | $1.2 \times 10^{-6}$        | d(pA) <sub>20</sub> ×d(pT) <sub>20</sub> | 20              | $1.7 \times 10^{-5}$        |

\* The average of three independent experiments: the determination error did not exceed 10-15%.

**References:**

1. Nevinsky, G.A.; Alinovskaya, L.I.; Sedykh, S.E.; Soboleva, S.E.; How human alpha-lactalbumin recognize DNA and RNA. *Biochem. Anal. Biochem.* **2018**, *7*, 4.



## Supplementary Table S25

$K_d(1)$  and  $K_d(2)$  values, characterizing affinity of different single stranded homo-ODNs to IgGs from the blood sera of patients with multiple sclerosis

| Ligand                 | $K_d(1)$ , M         | $K_d(2)$ , M         | Ligand                            | $K_d(1)$ , M         | $K_d(2)$ , M         | Ligand                   | $K_d(1)$ , M         | $K_d(2)$ , M         |
|------------------------|----------------------|----------------------|-----------------------------------|----------------------|----------------------|--------------------------|----------------------|----------------------|
| <i>Ortho-phosphate</i> | $1.0 \times 10^{-3}$ | $3.3 \times 10^{-3}$ | d(pR)**                           | $1.4 \times 10^{-4}$ | $4.3 \times 10^{-4}$ | -                        | -                    | -                    |
| dAMP                   | $6.3 \times 10^{-7}$ | $1.7 \times 10^{-4}$ | dCMP                              | $3.8 \times 10^{-6}$ | $2.8 \times 10^{-4}$ | dTMP                     | $1.9 \times 10^{-6}$ | $1.2 \times 10^{-5}$ |
| d(pA) <sub>2</sub>     | $1.5 \times 10^{-7}$ | $1.4 \times 10^{-6}$ | d(pC) <sub>2</sub>                | $3.1 \times 10^{-7}$ | $2.3 \times 10^{-6}$ | d(pT) <sub>2</sub>       | $7.5 \times 10^{-7}$ | $1.4 \times 10^{-6}$ |
| d(pA) <sub>4</sub>     | $5.8 \times 10^{-8}$ | $1.0 \times 10^{-6}$ | d(pC) <sub>3</sub>                | $1.8 \times 10^{-7}$ | $1.7 \times 10^{-6}$ | d(pT) <sub>3</sub>       | $1.5 \times 10^{-8}$ | $8.1 \times 10^{-7}$ |
| d(pA) <sub>6</sub>     | $2.2 \times 10^{-8}$ | $7.2 \times 10^{-7}$ | d(pC) <sub>4</sub>                | $5.7 \times 10^{-8}$ | $9.0 \times 10^{-7}$ | d(pT) <sub>4</sub>       | $1.6 \times 10^{-8}$ | $6.0 \times 10^{-7}$ |
| d(pA) <sub>8</sub>     | $2.2 \times 10^{-8}$ | $6.7 \times 10^{-7}$ | d(pC) <sub>6</sub>                | $1.0 \times 10^{-8}$ | $7.9 \times 10^{-7}$ | d(pT) <sub>6</sub>       | $1.0 \times 10^{-9}$ | $2.7 \times 10^{-7}$ |
| d(pA) <sub>9</sub>     | $2.2 \times 10^{-8}$ | $4.5 \times 10^{-7}$ | d(pC) <sub>8</sub>                | $3.7 \times 10^{-9}$ | $6.6 \times 10^{-7}$ | d(pT) <sub>8</sub>       | $1.1 \times 10^{-8}$ | $2.3 \times 10^{-7}$ |
| d(pA) <sub>10</sub>    | $2.1 \times 10^{-8}$ |                      |                                   |                      | $4.6 \times 10^{-7}$ | d(pT) <sub>10</sub>      | $1.4 \times 10^{-8}$ | $2.4 \times 10^{-7}$ |
| d(pA) <sub>12</sub>    | $1.9 \times 10^{-8}$ | $3.4 \times 10^{-7}$ | d(pC) <sub>10</sub>               | $3.2 \times 10^{-9}$ | $3.9 \times 10^{-7}$ | d(pT) <sub>11</sub>      | $1.4 \times 10^{-8}$ | $2.9 \times 10^{-7}$ |
| d(pA) <sub>13</sub>    | $1.9 \times 10^{-8}$ | $3.1 \times 10^{-7}$ | d(pC) <sub>12</sub>               | $3.1 \times 10^{-9}$ | $3.8 \times 10^{-7}$ | d(pT) <sub>16</sub>      | $1.3 \times 10^{-8}$ | $2.0 \times 10^{-7}$ |
| d(pA) <sub>15</sub>    | $1.9 \times 10^{-8}$ | $2.9 \times 10^{-7}$ | d(pC) <sub>14</sub>               | $2.9 \times 10^{-9}$ | $3.6 \times 10^{-7}$ | d(pT) <sub>24</sub>      | $1.3 \times 10^{-8}$ | $1.6 \times 10^{-7}$ |
| d(pA) <sub>16</sub>    | $1.9 \times 10^{-8}$ | $2.3 \times 10^{-7}$ | d(pC) <sub>16</sub>               | $3.0 \times 10^{-9}$ | $3.4 \times 10^{-7}$ | -                        | -                    | -                    |
| d(pA) <sub>20</sub>    | $2.0 \times 10^{-8}$ | $2.0 \times 10^{-7}$ | d(pTHF) <sub>6</sub> <sup>r</sup> | $3.9 \times 10^{-7}$ | $1.0 \times 10^{-4}$ | d[T(pTHF) <sub>5</sub> ] | $5.1 \times 10^{-9}$ | $1.5 \times 10^{-6}$ |

\*Mean  $\pm$  S.E. of two independent measurements are given; the error did not exceed 10-215%.

\*\*Deoxyribosephosphate, R is deoxyribose

<sup>r</sup>THF is a tetrahydrofuran

### References:

1. Andreev, S.K.; Buneva V.N.; Nevinsky, G.A. How human IgGs against DNA recognize oligonucleotides and DNA. *J. Mol. Recognit.* **2016**, *29*, 596-610.

## Supplementary Table S26

$K_d(1)$  and  $K_d(2)$  values, characterizing affinity of different single stranded hetero-ODNs to IgG from the blood sera of patients with multiple sclerosis \*.

| Ligand            | Number of units ( $n$ ) | $K_d(1)$ , M         | $K_d(2)$ , M         |
|-------------------|-------------------------|----------------------|----------------------|
| d(pTC)            | 2                       | $8.2 \times 10^{-7}$ | $3.8 \times 10^{-6}$ |
| d(pTGC)           | 3                       | $1.0 \times 10^{-7}$ | $2.1 \times 10^{-6}$ |
| d(pTTGC)          | 4                       | $2.2 \times 10^{-7}$ | $5.2 \times 10^{-6}$ |
| d(pTTGG)          | 4                       | $8.0 \times 10^{-8}$ | $2.4 \times 10^{-6}$ |
| d(pGAATTC)        | 6                       | $5.3 \times 10^{-8}$ | $2.5 \times 10^{-6}$ |
| d(pAAAGCAGG)      | 8                       | $2.3 \times 10^{-8}$ | $2.2 \times 10^{-6}$ |
| d(pTTCTTCTTC)     | 9                       | $1.3 \times 10^{-8}$ | $1.3 \times 10^{-6}$ |
| d(pTGATGATGA)     | 9                       | $2.8 \times 10^{-8}$ | $2.9 \times 10^{-6}$ |
| d(pGATGTCTGGTCCA) | 13                      | $4.5 \times 10^{-9}$ | $5.2 \times 10^{-7}$ |

\*Mean  $\pm$  S.E. of two independent measurements are given; the error did not exceed 10-15%.

### References:

1. Andreev, S.K.; Buneva V.N.; Nevinsky, G.A. How human IgGs against DNA recognize oligonucleotides and DNA. *J. Mol. Recognit.* **2016**, *29*, 596-610.
